# Supplementary material
Source: ML conference proceedings conference paper supplement (https://openreview.net/forum?id=7PJ6LaIOO4)
Supplement: supplementary_material [file attachment]

---

# Statistical and Computational Trade-off in Multi-Agent Multi-Armed Bandits

---

**Filippo Vannella**  
KTH and Ericsson Research  
Stockholm, Sweden  
vannella@kth.se

**Alexandre Protiere**  
KTH  
Stockholm, Sweden  
alepro@kth.se

**Jaeseong Jeong**  
Ericsson Research  
Stockholm, Sweden  
jaeseong.jeong@ericsson.com

## Abstract

We study the problem of regret minimization in Multi-Agent Multi-Armed Bandits (MAMABs) where the rewards are defined through a factor graph. We derive an instance-specific regret lower bound and characterize the minimal expected number of times each global action should be explored. This bound and the corresponding optimal exploration process are obtained by solving a combinatorial optimization problem whose set of variables and constraints exponentially grow with the number of agents, and cannot be exploited in the design of efficient algorithms. Inspired by Mean Field approximation techniques used in graphical models, we provide simple upper bounds of the regret lower bound. The corresponding optimization problems have a reduced number of variables and constraints. By tuning the latter, we may explore the trade-off between the achievable regret and the complexity of computing the corresponding exploration process. We devise Efficient Sampling for MAMAB (ESM), an algorithm whose regret asymptotically matches the approximated lower bounds. The regret and computational complexity of ESM are assessed numerically, using both synthetic and real-world experiments in radio communications networks.

## 1 Introduction

The stochastic Multi-Agent Multi-Armed Bandits (MAMABs) [35, 2, 3] is a combinatorial sequential decision-making problem that generalizes the classical stochastic MAB problem by assuming that (i) a *global action* is defined by actions individually selected by a set of agents, and (ii) the *reward* function is defined through a factor graph, which defines inter-dependencies between agents. This reward structure arises naturally in applications where agents interact in a graph with the need to coordinate towards a common goal. MAMABs can model a wide range of real-world problems, from wind farm control [2, 37] to radio communication networks parameters optimization (see Fig. 1).

Despite the wide spectrum of their potential applications, MAMABs are extremely hard to solve, even when the reward function is known. The main challenge stems from the combinatorial structure of the action set (there are  $K^N$  possible global actions, where  $N$  is the number of agents and  $K$  is the number of actions per agent). This issue is exacerbated in the learning setting where the reward function has to be inferred. In this work, we study the regret minimization problem in MAMABs, and more specifically, the trade-off between statistical efficiency (the learner aims at achieving low regret), and computational efficiency (she will typically have to solve combinatorial optimization problems over the set of possible global actions while learning).

**Contributions.** We present statistically and computationally efficient algorithms for MAMABs. Our algorithms enjoy (in the worst case) regret guarantees scaling as  $\rho K^d \log(T)$ , where  $K$  is the number of actions per agent,  $\rho$  and  $d$  are the number of factors and the maximal degree of the graph defining the reward function. This scaling illustrates the gains one may achieve by exploiting the factor graph structure: without leveraging it, the regret would scale as  $K^N \log(T)$ . Our algorithms have controllable computational complexity and can be applied in large-scale MAMABs. More precisely, our contributions are as follows.

1) *Regret lower bound.* We derive a regret lower bound satisfied by any algorithm. The bound is defined through a convex program (the *lower bound problem*), whose solution provides an optimal exploration strategy. Unfortunately, because of the factored reward structure, this optimization problem contains an exponential number of variables and constraints, and is hard to use in practice.

2) *Approximations of the lower bound problem.* We devise approximations of the lower bound problem by combining variable and constraint reduction techniques inspired by methods in the probabilistic graphical model literature [39, 20]. To reduce the number of variables, we propose (i) *locally tree-like* approximation, a tight relaxation for MAMAB instances described by acyclic factor graphs, and (ii) *Mean Field* (MF) approximation for general graphs. The MF approximation yields an upper bound of the regret lower bound, scaling as  $\rho K^d \log(T)$  (where  $T$  is the time horizon).

Both approximations yield lower bound problems with a polynomial number of variables and exponential number of constraints (in  $N$ ). To reduce the number of constraints, we propose a technique that leverages an ordering of the  $m$  smallest gaps and a Factored Constraint Reduction (FCR) method to represent the exponentially many constraints in a compact manner. The corresponding optimization problems have a reduced number of variables and constraints. By tuning the latter, we may explore the trade-off between the achievable regret and the complexity of computing the corresponding exploration process.

3) *The ESM algorithm.* Based on this approximation, we devise Efficient Sampling for MAMABs (ESM), an algorithm whose regret provably matches our approximated regret lower bound. The algorithm trades off statistical and computational complexity by performing exploration as prescribed by the solution of the approximated lower bound problem. We test the performance of ESM numerically on both synthetic experiments and learn to coordinate the antenna tilts in a radio communication network. In both sets of experiments, ESM can solve problems with a large number of global actions in a statistical and computationally efficient manner.

## 2 Related Work

Our work belongs to the framework of structured regret minimization in MABs, which encompasses a large variety of reward structures such as linear [21], unimodal [9], Lipschitz [11], etc. For general structured bandits, [8] propose Optimal Sampling for Structured Bandits (OSSB), a statistically optimal algorithm, i.e., matching the regret lower bound. The algorithm is computationally inefficient when applied to the MAMABs combinatorial structure. Our algorithm is inspired by OSSB, but relies on approximated lower bound problems to trade-off statistical and computational complexity.

A few studies investigate MAMABs with the same factored reward structure as ours [35, 2, 37]. These works focus on devising algorithms with regret guarantees using methods based on, e.g., Upper Confidence Bound (UCB) [35, 2] or Thompson Sampling (TS) [37]. For example, Stranders et al. [35] propose HEIST, an UCB-type algorithm whose asymptotic regret scales as  $O(K^N \Delta_{\max} / \Delta_{\min} \log(T))$ , where  $\Delta_{\min}$  and  $\Delta_{\max}$  are the minimal and maximal gaps, respectively. The MAUCE algorithm from Bargiacchi et al., [2] improves over [35] yielding asymptotic regret  $O(\rho^2 K^d \Delta_{\max}^2 / \Delta_{\min}^2 \log(T))$ . Our worst approximation improves of a factor  $\Delta_{\max}$  w.r.t. this bound, a quantity that typically scales with  $\rho K^d$  (see App. M).

There is a large body of work [24, 10, 12, 13, 38] investigating regret minimization in the (linear) *combinatorial semi-bandit feedback* setting. Although our model can be interpreted as a particular instance of this setting (see App. E for details), the MAMAB combinatorial structure has never been explicitly considered in this context. The closest related work is [12], in which the authors study a regret lower bound problem with an exponentially large number of variables and constraints. They leverage [12, Assumption 6] to compactly represent the lower bound optimization problem and propose a gradient-based procedure to solve it in polynomial time. Unfortunately, for MAMABs, the

above-mentioned assumption only holds for rewards described by acyclic factor graphs (see App. M). We propose computationally efficient approximations valid for any factor graph while retaining statistical tightness in the case of acyclic factor graphs.

### 3 Problem Setting

We consider the generic MAMAB model with factored structure introduced in [2]. The model is defined by the tuple  $\langle \mathcal{S}, \mathcal{A}, r \rangle$ , where:

1.  $\mathcal{S} = [N] \triangleq \{1, \dots, N\}$  is a set of  $N$  agents;
2.  $\mathcal{A} = \times_{i \in [N]} \mathcal{A}_i$  is a set of global actions, which is the Cartesian product over  $i$  of the set  $\mathcal{A}_i$  of actions available to the agent  $i$ . We assume w.l.o.g. that  $|\mathcal{A}_i| = K$ , for all  $i \in [N]$ , and define  $A \triangleq |\mathcal{A}| = K^N$ ;
3.  $r$  is the reward function mapping the global action to the collected reward.

**Rewards and their factor-graph representation.** We model the collected rewards. There are  $\rho$  possibly overlapping groups of agents  $(\mathcal{S}_e)_{e \in [\rho]}$ , with  $\mathcal{S}_e \subseteq \mathcal{S}$  and  $|\mathcal{S}_e| = N_e$ . The local reward generated by group  $e$  depends on group actions  $a_e \triangleq (a_i)_{i \in \mathcal{S}_e} \in \mathcal{A}_e \triangleq \times_{i \in \mathcal{S}_e} \mathcal{A}_i$  only. More precisely, each time  $a_e$  is selected, the collected local rewards are i.i.d. copies of a random variable  $r_e(a_e) \sim \mathcal{N}(\theta_e(a_e), 1/2)$ . Rewards collected in various groups are independent. The global reward for action  $a$  is then  $r(a) = \sum_{e \in [\rho]} r_e(a_e)$ , a random variable with expectation  $\theta(a) = \sum_{e \in [\rho]} \theta_e(a_e)$ . The number of possible group actions in group  $e$  is  $A_e \triangleq |\mathcal{A}_e| = K^{N_e}$ , and we define  $\tilde{A} \triangleq \sum_{e \in [\rho]} A_e$ . The reward function can be represented using a factor graph [39]. Factor graphs are bipartite graphs with two types of node:  $N$  *action nodes*, one for each agent, and  $\rho$  *factor nodes*, one for each group. An edge between a factor  $r_e$  and an agent  $i$  exists if the action  $a_i$  selected by the agent  $i$  is an input of  $r_e$ :  $i \in \mathcal{S}_e$ . Fig. 1 shows an example of a factor graph modeling interference in a radio communication network.

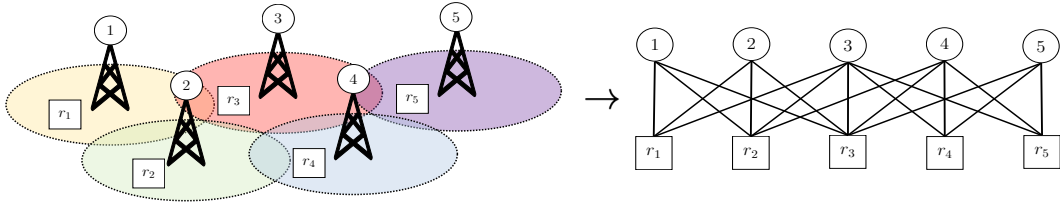

Figure 1: Factor graph in a radio communication network. An agent (represented by a circle) corresponds to a base-station (BS) whose transmissions cover a cell. The possible actions at a BS may correspond to different transmission power levels and antenna tilts (the physical angle of the antennas). The local rewards correspond to the throughput (in bit/s) achieved in a given cell, and hence each cell is associated with a factor (represented by a square). The throughput in a given cell depends on the action of the corresponding BS but also on those of neighboring BSs through interference. In the factor graph, each BS or agent has hence an edge to factors or cells it interferes.

**Sequential decision process.** The decision maker sequentially selects global actions based on the history of previous observations and receives a set of samples of the local rewards associated to the various groups. Specifically, in each round  $t \geq 1$ , the decision maker selects a global action  $a_t = (a_{t,1}, \dots, a_{t,N})$  and observes the local rewards  $r_t = (r_{t,1}, \dots, r_{t,\rho})$  from each group. The global action  $a_{t+1}$  is selected based on the history of observations  $\mathcal{H}_t = (a_s, r_s)_{s \in [t]}$ . This type of interaction is known as *semi-bandit* feedback.

**Regret minimization.** The goal is to devise an algorithm  $\pi = (a_t)_{t \geq 1}$ , i.e., a sequence of global actions  $a_t \in \mathcal{A}$  selected in each round  $t \geq 1$ , that minimizes the *regret* up to time  $T \geq 1$ , defined as

$$R^\pi(T) = \mathbb{E} \left[ \sum_{t=1}^T \theta(a_t^*) - \theta(a_t) \right],$$

where  $a_\theta^* \in \arg \max_{a \in \mathcal{A}} \theta(a)$  denotes the *best global action*. Throughout the paper, we assume that  $a_\theta^*$  is unique and we use  $a^*$  and  $a_\theta^*$  interchangeably. We define the gap of a sub-optimal global action  $a$  by  $\Delta(a) = \theta(a^*) - \theta(a)$ .

## 4 Regret Lower Bound

To derive instance-specific regret lower bounds, we restrict our attention to the class of *uniformly good* algorithms: An algorithm  $\pi$  is uniformly good if for any  $\theta, \forall \alpha > 0$ , we have that  $R^\pi(T) = o(T^\alpha)$ .

**Theorem 4.1.** *The regret of any uniformly good algorithm satisfies for any  $\theta$ ,  $\liminf_{T \rightarrow \infty} \frac{R^\pi(T)}{\log(T)} \geq C_\theta^*$ , where  $C_\theta^*$  is the value of the following convex optimization problem*

$$\min_{v \in \mathbb{R}_{\geq 0}^A} \sum_{a \in \mathcal{A}} v_a \Delta(a) \quad \text{s.t.} \quad \sum_{e \in [\rho]: a_e \neq a_\theta^*} \left( \sum_{b \in \mathcal{A} \setminus \{a_\theta^*\}: b_e = a_e} v_b \right)^{-1} \leq \Delta(a)^2, \quad \forall a \in \mathcal{A}. \quad (1)$$

The proof of this result leverages classical change-of-measure arguments [25] (see App. A.1 for details). If  $v^*$  denotes the solution of the lower bound optimization problem, then for  $a \neq a_\theta^*$ ,  $v_a^* \log(T)$  can be interpreted as the asymptotic expected number of times the sub-optimal action  $a$  is explored under a uniformly good algorithm minimizing regret. We conclude this section by reformulating (1) using *group variables*  $\tilde{v}$ . Introduce the *marginal cone*:

$$\tilde{\mathcal{V}} = \left\{ \tilde{v} \in \mathbb{R}_{\geq 0}^{\tilde{A}} : \exists v \in \mathbb{R}_{\geq 0}^A, \forall e \in [\rho], a_e \in \mathcal{A}_e, \tilde{v}_{e, a_e} = \sum_{b \in \mathcal{A} \setminus \{a_\theta^*\}: b_e = a_e} v_b \right\}.$$

The set  $\tilde{\mathcal{V}}$  contains group variables  $\tilde{v} = (\tilde{v}_e)_{e \in [\rho]}$  where  $\tilde{v}_e = (\tilde{v}_{e, a_e})_{a_e \in \mathcal{A}_e}$ .

**Lemma 4.2.** *For any  $\theta$ ,  $C_\theta^*$  is the value of the following convex optimization problem*

$$\min_{\tilde{v} \in \tilde{\mathcal{V}}} \sum_{e \in [\rho], a_e \in \mathcal{A}_e} \tilde{v}_{e, a_e} (\theta_e(a_e^*) - \theta_e(a_e)) \quad \text{s.t.} \quad \sum_{e \in [\rho]: a_e \neq a_\theta^*} \tilde{v}_{e, a_e}^{-1} \leq \Delta(a)^2, \quad \forall a \in \mathcal{A}. \quad (2)$$

Again, if the solution of (2) is  $\tilde{v}^*$ , then for any  $e \in [\rho]$  and  $a_e \in \mathcal{A}_e$ ,  $\tilde{v}_{e, a_e}^* \log(T)$  can be interpreted as the asymptotic expected number of times the group action  $a_e$  is selected under an optimal algorithm when it explores, i.e., when the global action  $a \neq a_\theta^*$ .

## 5 Lower Bound Approximations

As suggested above, if we are able to solve (1) and hence obtain  $v^*$ , the latter specifies the optimal exploration process. From there, we could devise an algorithm with minimal regret [8]. Unfortunately, solving (1) is an extremely hard task, even for relatively small problems. Indeed, the problem has  $K^N$  variables and  $K^N$  constraints, and using general-purpose solvers, e.g., based on the interior-point method, would require  $\text{poly}(K^N) \log(1/\varepsilon)$  floating-point operations [33]. To circumvent this difficulty, we present approximations of the lower bound problem with a reduced number of variables and constraints. We will then leverage these approximations to design efficient algorithms.

### 5.1 Variable reduction

To reduce the number of variables, we apply approximation techniques inspired by methods in the probabilistic graphical model literature [39]. In Sec. 5.1.1, we first propose a *locally tree-like* reduction, yielding an optimization problem whose value  $C_\theta^L$  exactly matches the true lower bound  $C_\theta^*$  for MAMABs with acyclic factor graphs (see App. J for a formal definition and examples). For graphs containing cycles however, we have  $C_\theta^L < C_\theta^*$ , and hence for those graphs, it is impossible to devise an algorithm based on this reduction (such an algorithm would lead to a regret  $C_\theta^L \log(T)$ , which contradicts the lower bound).

Instead, for general graphs, we propose in Sec. 5.1.2 the  *$\psi$ -mean-field* reduction, an approximation based on a local decomposition inspired by Mean Field (MF) methods [39]. The  $\psi$ -mean field reduction leads to an optimization problem whose value  $C_\theta^{\text{MF}}$  provably upper bounds  $C_\theta^*$ , and hence that can be used to devise an algorithm with regret approaching  $C_\theta^{\text{MF}} \log(T)$ .

### 5.1.1 Locally tree-like reduction

This reduction imposes local consistency constraints between group variables  $\tilde{v}$  and local variables *local variables*  $w = (w_i)_{i \in [N]}$ , where  $w_i = (w_{i,a_i})_{a_i \in \mathcal{A}_i} \in \mathbb{R}_{\geq 0}^K$ . Define the local cone as:

$$\tilde{\mathcal{V}}_L = \left\{ \tilde{v} \in \mathbb{R}^{\tilde{A}} : \exists w \in \mathbb{R}_{\geq 0}^{KN} : \forall e \in [\rho], \forall i \in \mathcal{S}_e, \forall a_i \in \mathcal{A}_i, w_{i,a_i} = \sum_{b_e \in \mathcal{A}_e: b_e \sim a_i} \tilde{v}_{b_e} \right\},$$

where the notation  $a_e \sim a_i$  means that the  $i^{\text{th}}$  element of  $a_e$  equals  $a_i$ . The locally tree-like approximation, presented in the next lemma, is obtained by replacing  $\tilde{\mathcal{V}}$  by  $\tilde{\mathcal{V}}_L$  in (2).

**Lemma 5.1.** *For any  $\theta$  with rewards described by an acyclic factor graph, we have that  $C_\theta^* = C_\theta^L$ , where  $C_\theta^L$  is the value of the following convex optimization problem:*

$$\min_{\tilde{v} \in \tilde{\mathcal{V}}_L} \sum_{e \in [\rho], a_e \in \mathcal{A}_e} \tilde{v}_{e,a_e} (\theta_e(a_e^*) - \theta_e(a_e)) \quad \text{s.t.} \quad \sum_{e \in [\rho]: a_e \neq a_e^*} \tilde{v}_{e,a_e}^{-1} \leq \Delta(a)^2, \quad \forall a \in \mathcal{A}. \quad (3)$$

The proof is presented in App. A.2. This approximation reduces the number of variables from  $K^N$  to  $\tilde{A} + KN$ . The lemma states that, for acyclic factor graphs, the locally tree-like approximation (3) is tight, i.e.,  $C_\theta^L = C_\theta^*$ . Unfortunately, for general graphs, we have that  $C_\theta^L < C_\theta^*$  (a direct consequence of [39, Prop. 4.1]), and hence it is impossible to devise algorithms based on this approximation.

### 5.1.2 $\psi$ -Mean-Field reduction

Our  $\psi$ -MF reduction is loosely inspired by MF approximation methods in graphical models [39]. It consists in decomposing global variables  $v$  as a function  $\psi$  of the local variables  $w = (w_i)_{i \in [N]}$ . Specifically, the  $\psi$ -MF reduction introduces the following set of constraints:  $v_a = \psi_a(w)$ ,  $\forall a \neq a_\theta^*$ , where  $\psi_a : \mathbb{R}_{\geq 0}^{KN} \rightarrow \mathbb{R}_{\geq 0}$ . Let  $\mathcal{V}_\psi = \{v \in \mathbb{R}_{\geq 0}^{\tilde{A}} : \exists w \in \mathbb{R}_{\geq 0}^{KN}, v_a = \psi_a(w), \forall a \neq a_\theta^*\}$ , and define the  $\psi$ -MF marginal cone as

$$\tilde{\mathcal{V}}_{\psi\text{-MF}} = \left\{ \tilde{v} \in \mathbb{R}_{\geq 0}^{\tilde{A}} : \exists v \in \mathcal{V}_\psi, \forall e \in [\rho], a_e \in \mathcal{A}_e, \tilde{v}_{e,a_e} = \sum_{b \in \mathcal{A} \setminus \{a_\theta^*\}: b_e = a_e} v_b \right\}.$$

We get the  $\psi$ -MF approximation,  $C_\theta^{\psi\text{-MF}}$  by replacing  $\tilde{\mathcal{V}}$  by  $\tilde{\mathcal{V}}_{\psi\text{-MF}}$  in (2).

**Lemma 5.2.** *For any  $\theta, \psi$ , we have that  $C_\theta^* \leq C_\theta^{\psi\text{-MF}}$ , where  $C_\theta^{\psi\text{-MF}}$  is the value of the optimization problem:*

$$\min_{\tilde{v} \in \tilde{\mathcal{V}}_{\psi\text{-MF}}} \sum_{e \in [\rho], a_e \in \mathcal{A}_e} \tilde{v}_{e,a_e} (\theta_e(a_e^*) - \theta_e(a_e)) \quad \text{s.t.} \quad \sum_{e \in [\rho]: a_e \neq a_e^*} \tilde{v}_{e,a_e}^{-1} \leq \Delta(a)^2, \quad \forall a \in \mathcal{A}. \quad (4)$$

Clearly, the tractability of the problem  $C_\theta^{\psi\text{-MF}}$  depends on the choice of  $\psi$ . A natural choice would be  $\psi_a(w) = \prod_{i \in [N]} w_{i,a_i}$ , as proposed, e.g., in approximate inference methods [39]. However, this choice leads to a non-convex program (see App. B). The following lemma proposes a choice of  $\psi$  which leads to a convex program over local variables  $w$  only.

**Lemma 5.3.** *Let  $\psi_a(w) = \sum_{i \in [N]} w_{i,a_i}$ ,  $\forall a \neq a^*$ . Then  $C_\theta^{\psi\text{-MF}}$  is the value of the following convex optimization problem:*

$$\min_{w \in \mathbb{R}_{\geq 0}^{KN}} \sum_{e \in [\rho], a_e \in \mathcal{A}_e} f_{e,a_e}(w) (\theta_e(a_e^*) - \theta_e(a_e)) \quad \text{s.t.} \quad \sum_{e \in [\rho]: a_e \neq a_e^*} f_{e,a_e}(w)^{-1} \leq \Delta(a)^2, \quad \forall a \in \mathcal{A}, \quad (5)$$

where  $f_{e,a_e}(w) = K^{N-|S_e|} \sum_{i \in S_e, a_i \in \mathcal{A}_i} w_{i,a_i} + K^{N-|S_e|-1} \sum_{i \notin S_e} w_{i,a_i}$ . Furthermore, it holds that  $C_\theta^{\psi\text{-MF}} \leq \rho \Delta_{\min}^{-2} \sum_{e \in [\rho], a_e \in \mathcal{A}_e} (\theta_e(a_e^*) - \theta_e(a_e))$ , where  $\Delta_{\min} = \min_{a \neq a^*} \Delta(a)$ .

The proof is presented in App. A.3. The lemma provides a worst-case scaling of  $C_\theta^{\psi\text{-MF}}$ : it scales at most as  $\tilde{A} = \sum_{e \in [\rho]} K^{|S_e|}$  (remember that if we were considering a MAMAB as a standard bandit problem, the latter would have  $K^N$  arm and hence a regret scaling exponentially in  $N$ ). The number of variables involved in (5) is  $KN$ . The quantities  $(f_{e,a_e}(w))_{e \in [\rho], a_e \in \mathcal{A}_e}$  are group quantities interpreted as the group variables  $\tilde{v}_{e,a_e}$ , and uniquely determined by local variables  $w$ . In the following, we use the notation  $C_\theta^{\text{MF}}$  to represent  $C_\theta^{\psi\text{-MF}}$  for the function  $\psi$  defined in Lemma 5.3.

## 5.2 Constraint reduction

The remaining challenge is to reduce the number of constraints in (3), (4) or (5). For each global action  $a$ , the constraint writes  $\sum_{e \in [\rho]} \tilde{v}_{e,a_e}^{-1} \leq \Delta(a)^2$ . The major issue is the non-linearity of the function appearing in the constraints w.r.t. group actions  $a_e$ . Upon inspection, it appears that the heterogeneity in the gaps (generally  $\Delta(a) \neq \Delta(b)$  for  $a \neq b$ ) is causing the non-linearity. To address this problem, we present, in the following lemma, a family of approximations leveraging an ordering of the first  $m$  smallest gaps. For  $m \in [K^N]$ , let  $a^{(m)}$  be the  $m^{\text{th}}$  best global action and, for  $m \in [K^N - 1]$ , let  $\Delta_m = \theta(a_\theta^*) - \theta(a^{(m+1)})$  be the  $m^{\text{th}}$  minimal non-zero gap (with ties breaking arbitrarily).

**Lemma 5.4.** *Let  $m \in [K^N - 1]$ , and  $\diamond \in \{\text{L}, \text{MF}\}$ . Let  $C_\theta^\diamond(m)$  be the value of the convex program:*

$$\min_{\tilde{v} \in \tilde{\mathcal{V}}_\diamond} \sum_{e \in [\rho], a_e \in \mathcal{A}_e} \tilde{v}_{e,a_e} (\theta_e(a_e^*) - \theta_e(a_e)) \quad (6)$$

$$\text{s.t.} \quad \sum_{e \in [\rho]: a_e^{(j+1)} \neq a_e^*} \tilde{v}_{e,a_e}^{-1} \leq \Delta_j^2, \quad \forall j \in [m] \quad (7)$$

$$\sum_{e \in [\rho]: a_e \neq a_e^*} \tilde{v}_{e,a_e}^{-1} \leq \Delta_m^2, \quad \forall a \in \mathcal{A} \setminus \cup_{j \in [m]} \{a^{(j+1)}\}. \quad (8)$$

Then, for any  $\diamond \in \{\text{L}, \text{MF}\}$ ,  $m \in [K^N - 2]$ , we have  $C_\theta^\diamond(m+1) \leq C_\theta^\diamond(m)$ ,  $C_\theta^* \leq C_\theta^\diamond(m)$ , and by definition  $C_\theta^\diamond(K^N - 1) = C_\theta^\diamond$ .

The proof is reported in App. F. Clearly,  $C_\theta^\diamond(m)$  has still  $|\mathcal{A}|$  constraints (7)-(8). However, as the gap  $\Delta_m$  used in (8) is constant, these constraints are now a linear sum of terms depending on group actions  $a_e$ . For constraints with this type of structure, there exists an efficient and provably equivalent representation. The procedure yielding this representation, which we refer to as FCR, is based on a generalization of the popular Factored LP algorithm described in [19, 20] for Factored Markov Decision Processes (FMDPs).

For the sake of brevity, we briefly describe the procedure below and postpone its detailed exposition to App. G. FCR is inspired by the Variable Elimination (VE) procedure in graphical models [14]. It iteratively eliminates constraints from (8), according to an elimination order  $\mathcal{O}$ . The elimination procedure induces an *elimination graph*, which encodes dependencies between constraints as we perform elimination. As shown in the following lemma, the number of constraints is exponential in the degree  $A_\mathcal{O}$  of the elimination graph induced by the order of elimination  $\mathcal{O}$ .

**Lemma 5.5.** *There exists a procedure which, given the constraints in (8) returns a provably equivalent constraint set of size  $O(NK^{A_\mathcal{O}+1})$ .*

Although for general graphs finding an ordering  $\mathcal{O}$  minimizing  $A_\mathcal{O}$  is an  $\mathcal{NP}$ -hard problem [14], for specific graphs there are orderings yielding  $A_\mathcal{O} \ll N$ . For example, these orderings yield  $A_\mathcal{O} = 2$  for line or star factor graphs, and  $A_\mathcal{O} = 3$  for ring factor graphs, independently of the number of agents  $N$  (see Fig. 3 and refer to App. J for details). Solving  $C_\theta^\diamond(m)$ , requires computing the first  $m+1$  best global actions and the  $m$  minimal gaps. To solve this task, the *elim- $m$ -opt* algorithm [15] has complexity  $O((m+1)NK^{A_\mathcal{O}+1})$  (see App. G). Fig. 2 shows an illustration of the trade-off between statistical and computational complexity. Note that ESM is meant to be applied when  $m$  does not grow exponentially in  $N$ . In practice, we observed that selecting  $m = \bar{A}$  yields a good trade-off between statistical complexity and computational complexity.

## 6 The ESM algorithm

In this section, we present ESM, an algorithm whose regret matches (asymptotically) our approximated lower bounds. The algorithm is inspired by OSSB [8]. It ensures that sub-optimal actions are sampled as prescribed by the solution of the approximated optimization problems  $C_\theta^{\text{MF}}(m)$  or  $C_\theta^{\text{L}}(m)$ : each group  $e$  must explore each group action  $a_e$  for  $\tilde{v}_{e,a_e} \log(T)$  times, and selecting the action yielding the largest estimated reward for the remaining rounds. As the lower bounds depend on the unknown parameter  $\theta$ , it has to be estimated.

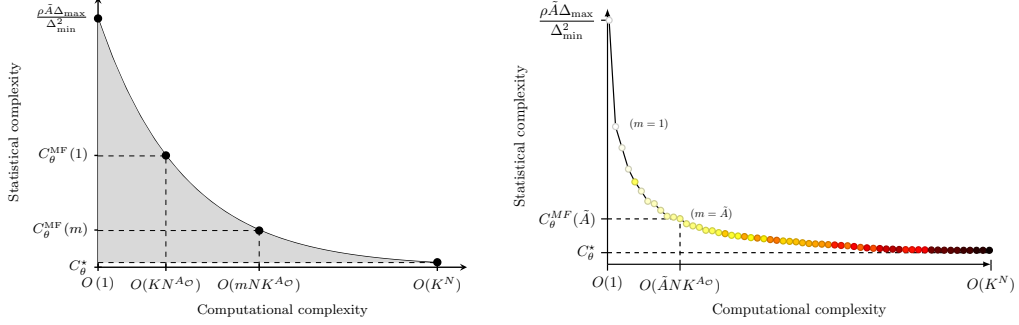

Figure 2: Left: idealized curve illustrating possible ranges of the trade-off between statistical and computational complexity for  $C^{\text{MF}}(m)$ , when varying  $m$ . Right: an instance of this trade-off for a line factor graph (darker colors for the points represent higher running times). Selecting  $m = \tilde{A}$  yields a good trade-off between computational and statistical complexity for this instance.

Generally, the estimation of  $\theta$  would require evaluating an exponentially large number of components, i.e.,  $\theta(a), \forall a \in \mathcal{A}$ . Instead, by leveraging the factored reward structure, we can simply focus on estimating group parameters  $(\theta_e)_{e \in [\rho]}$ . We define the estimate at time  $t$ , group  $e$ , and action  $a_e$  as  $\hat{\theta}_{t,e,a_e} = \frac{1}{N_{t,e,a_e}} \sum_{s \in [t]: a_{s,e} = a_e} r_{s,e}$  where  $N_{t,e,a_e} = \sum_{s \in [t]} \mathbb{1}_{\{a_{s,e} = a_e\}}$  is the number of times action  $a_e$  is selected for group  $e$ . We also define  $\hat{\theta}_t = (\hat{\theta}_{t,e,a_e})_{e \in [\rho], a_e \in \mathcal{A}_e}$ , and  $N_t = (N_{t,e,a_e})_{e \in [\rho], a_e \in \mathcal{A}_e}$ .

---

**Algorithm 1**  $\text{ESM}(\mathcal{A}_0, \varepsilon, \gamma, \diamond, m)$

---

```

Sample each group actions in  $\mathcal{A}_0$  once and update  $(N_{T_0}, \hat{\theta}_{T_0}); s_{T_0} = 0$  ▷ Initialization
for  $t = T_0, \dots, T$  do
   $((\tilde{v}_{t,e})_{e \in [\rho]}) \leftarrow \text{Solve } C_{\hat{\theta}_t}^\diamond(m)$ 
  if  $N_{t,e,a_e} \geq (1 + \gamma)\tilde{v}_{t,e,a_e} \log(t), \forall e \in [\rho], a_e \in \mathcal{A}_e$  then ▷ Exploitation
     $a_t = a_{\hat{\theta}_t}^*$ 
     $s_t = s_{t-1}$ 
  else
     $s_t = s_{t-1} + 1$ 
    if  $\min_{e \in [\rho], a_e \in \mathcal{A}_e} N_{t,e,a_e} \leq \varepsilon s_t$  then ▷ Estimation
       $a_t \in \mathcal{A}_0 : a_{t,e'} = b_{e'} \text{ with } (e', b_{e'}) \in \arg \min_{e,a_e} N_{t,e,a_e}$ 
    else ▷ Exploration
       $a_t \in \mathcal{A} : a_{t,e'} = b_{e'} \text{ with } (e', b_{e'}) \in \arg \min_{e,a_e} \frac{N_{t,e,a_e}}{\tilde{v}_{t,e,a_e}}$ 
    Update  $(N_{t,e,a_t,e}, \hat{\theta}_{t,e,a_t,e})_{e \in [\rho]}$ 

```

---

The pseudocode of ESM is presented in Alg. 1. It takes as inputs two exploration parameters  $\varepsilon, \gamma > 0$ , an exploration set  $\mathcal{A}_0 \subset \mathcal{A}$ , the approximation parameter  $m \in [K^N - 1]$ , and  $\diamond \in \{\text{MF}, \text{L}\}$  depending on the targeted regret lower bound approximation. The parameters  $\varepsilon, \gamma > 0$  impact the amount of exploration performed by ESM. When decreasing both these parameters the exploration of ESM also decreases. After an initialization phase, the algorithm alternates between three additional phases as described below.

**Initialization.** In the initialization phase, we select actions from  $\mathcal{A}_0$  to ensure that each group action is sampled at least once. The set  $\mathcal{A}_0 \subseteq \mathcal{A}$  is chosen in such a way that it covers all possible group actions, i.e.,  $\mathcal{A}_0$  is such that  $\forall e \in [\rho], \forall a_e \in \mathcal{A}_e, \exists b \in \mathcal{A}_0 : b_e = a_e$ . In App. I, we present an efficient routine to select  $\mathcal{A}_0$ . Let  $T_0 = \inf \{t \geq 0 : N_{t,e,a_e} > 0, \forall e \in [\rho], a_e \in \mathcal{A}_e\}$  be the length of the initialization phase. For  $t \leq T_0$  we select  $a_t \in \mathcal{A}_0 : a_{t,e'} = b_{e'} \text{ with } (e', b_{e'}) \in \arg \min_{e,a_e} N_{t,e,a_e}$  (with ties breaking arbitrarily), i.e., we select a global action containing the most under-explored group action. This choice ensures that  $T_0 \leq \tilde{A}$ . For  $t > T_0$ , the algorithm solves the approximated lower bound optimization problem  $C_{\hat{\theta}_t}^\diamond(m)$  and alternates between exploitation, exploration, and estimation.

**Exploitation.** If  $N_{t,e,a_e} \geq (1 + \gamma)\tilde{v}_{t,e,a_e} \log(t)$ , ESM enters the exploitation phase: it selects the best empirical action  $a_{\hat{\theta}_t}^* = \arg \max_{a \in \mathcal{A}} \sum_{e \in [\rho]} \hat{\theta}_{t,e,a_e}$ . Generally, computing  $a_{\hat{\theta}_t}^*$  requires a max operation over an exponential number of actions  $a \in \mathcal{A}$ . Fortunately, due to the factored structure, we can implement the max operation efficiently through a VE procedure [39] (see App. G).

**Estimation.** If not enough information has been gathered, ESM enters an estimation phase, where it selects the least explored group action similarly to the initialization phase. This ensures that the *certainty equivalence* holds, i.e., that  $\hat{\theta}_t$  is estimated accurately.

**Exploration.** Otherwise, the algorithm enters the exploration phase and selects actions as suggested by the solution of  $C_{\hat{\theta}_t}^\circ(m)$ . More precisely, we select a global action  $a_t \in \mathcal{A}$  which contains a group action  $a_{t,e'} = b_{e'}$  that minimizes the following ratio where  $e'$  and  $b_{e'}$  are the group index and group action which minimize  $\frac{N_{t,e,a_e}}{\tilde{v}_{t,e,a_e}}$ .

**Upper bound.** We establish that the ESM algorithm achieves a regret, matching the approximate lower bound  $C_\theta^\circ(m) \log(T)$ , asymptotically as  $T \rightarrow \infty$ . The proof is given in App. D.

**Theorem 6.1.** *Let  $\varepsilon < 1/|\mathcal{A}_0|$ . For any  $m \in [K^N - 1]$ , we have that*

1.  $\limsup_{T \rightarrow \infty} \frac{R^\pi(T)}{\log(T)} \leq C_\theta^{\text{MF}}(m)\xi(\varepsilon, \gamma)$ , for  $\pi = \text{ESM}(\mathcal{A}_0, \varepsilon, \gamma, \text{MF}, m)$ , for any  $\theta$ ,
2.  $\limsup_{T \rightarrow \infty} \frac{R^\pi(T)}{\log(T)} \leq C_\theta^{\text{L}}(m)\xi(\varepsilon, \gamma)$ , for  $\pi = \text{ESM}(\mathcal{A}_0, \varepsilon, \gamma, \text{L}, m)$ , for any  $\theta$  described by acyclic factor graphs,

where  $\xi$  is a function such that  $\lim_{(\varepsilon, \gamma) \rightarrow (0,0)} \xi(\varepsilon, \gamma) = 1$ .

## 7 Experiments

In this section, we present numerical experiments to assess the performance of our algorithm. We propose two sets of experiments: (i) a set of synthetic MAMABs with different graph topologies, and (ii) an industrial use-case from the radio communication domain: *antenna tilt optimization*. The code for the synthetic experiments and the additional experiments presented in App. K is available at this link.

### 7.1 Synthetic Experiments

**Problem instances.** We consider the factor graphs depicted in Fig. 3. The expected rewards are selected uniformly at random in the interval  $[0, 10]$ . In our experiments, select  $N = 5$  and  $K = 3$ . We execute our experiments for  $N_{\text{sim}} = 5$  independent runs. Following previous work [8], we select  $\gamma = 0$ , and  $\varepsilon = 0.01$ . The elimination order is chosen as  $\mathcal{O} = [N]$ . We implement the solver for the lower bound optimization problems using CVXPY [17] with a MOSEK solver [1].

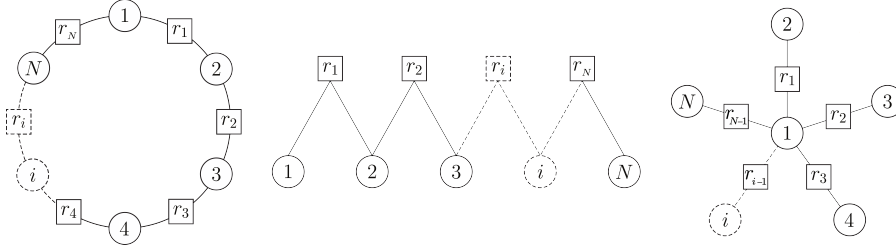

Figure 3: Factor graphs used in the synthetic experiments: *ring* (left), *line* (center), *star* (right).

**Results.** The results for the regret (in log scale) are presented in Fig. 4. The performance of ESM is compared to that of MAUCE [3], HEIST [35], and to a random strategy selecting actions uniformly at random. The computational complexity results, reported in Fig. 5, measure the running time (in sec.) to solve an instance of the approximate lower bound optimization problem  $C_\theta^\circ(m)$ . We use  $m = \tilde{A}$ , and  $\diamond = \text{MF}$  for the ring, or  $\diamond = \text{L}$  for the star and line graph topologies.



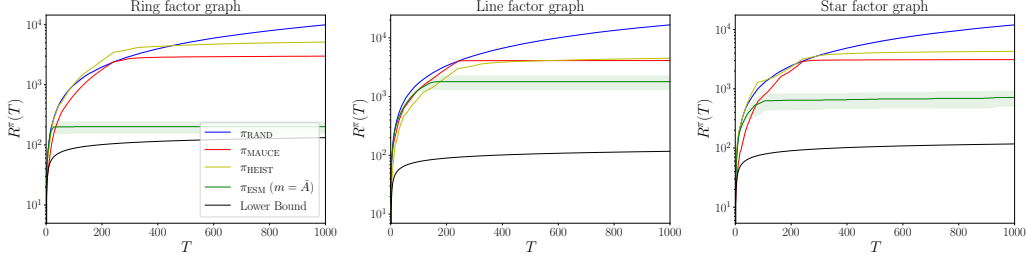

Figure 4: Regret results for the synthetic instances.

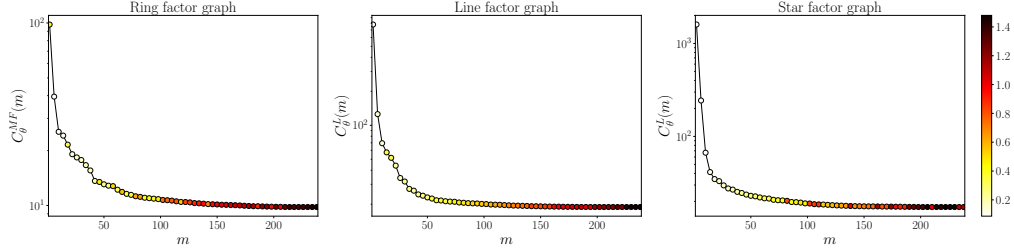

Figure 5: Running time (in sec.) to solve an instance of  $C_{\diamond}^{\theta}(m)$ , when varying  $m$ .

## 7.2 Antenna tilt optimization

Next, we test our algorithm on a radio network optimization task. The goal is to control the vertical antenna tilt at different network Base Stations to optimize the network throughput. In the following, we detail the network model, our simulation setup, and present our experimental results.

**Network model.** We consider a sectorized radio network consisting of a set of *sectors*  $\mathcal{S} = [N]$ . The set of sectors corresponds to the set of agents in our MAMAB framework. Since each sector is associated to a unique antenna, we will use the terms *sector* and *antenna* interchangeably. We assume that each sector  $i \in \mathcal{S}$  serves (on the downlink) a fixed set of Users Equipments (UEs)  $\mathcal{U}_i$  (each UE is associated with a unique antenna, that from which it receives the strongest signal).

**Factor graph.** We model the observed reward in the radio network as a factor graph with  $N = |\mathcal{S}|$  agent nodes and  $\rho = |\mathcal{S}|$  factor nodes. Each sector is associated with a unique factor, which models the rewards observed in that sector. We build the factor graph based on the interference pattern of the antennas, i.e., antennas that can interfere with each other are connected to common factors. An example of such a graph and additional experimental details are reported in App. L.

**Actions and rewards.** The action  $a_{t,i}$  represents the antenna tilt for sector  $i \in \mathcal{S}$  and at time  $t$ . It is chosen from a discrete set of  $K$  tilts, i.e.,  $a_{t,i} \in \{\alpha_1, \dots, \alpha_K\}$ . The tilt for a group of sectors  $e$  is denoted by  $a_e$ . Rewards are based on the throughput of UEs in sector  $i$ , which depends on the actions of a group of agents  $a_e$ :  $r_e(a_e) = \sum_{u \in \mathcal{U}_i} T_{i,u}(a_e)$ , where  $T_{i,u}$  is the throughput of an UE  $u$  associated to sector  $i$ . Hence, the global reward for a tilt configuration  $a \in \mathcal{A}$  is  $r(a) = \sum_{i \in [N]} \sum_{u \in \mathcal{U}_i} T_{i,u}(a_e)$ . The throughput  $T_{i,u}$  depends on channel conditions (or *fading*) between the antenna and the user. These conditions rapidly evolve over time around their mean.

**Simulator.** We run our experiments in a proprietary mobile network simulator in an urban environment. The simulation parameters used in our experiments are reported in App. K. Based on the user positions and network parameters, the simulator computes the path loss in the network environment using a BEZT propagation model [32] and returns the throughput for each sector by conducting user association and resource allocation in a full-buffer traffic demand scenario.

**Results.** We test our algorithm for  $\mathcal{A}_i = \{2^\circ, 7^\circ, 13^\circ\}$ , and for  $|\mathcal{S}| = 6$  sectors. As the factor graph contains cycles, we use  $\diamond = \text{MF}$  and select  $m = 3$ . The results, presented in Fig. 6, are in line with the experimental findings of the previous section. However, the ESM running time is higher due to the higher complexity of the factor graph.

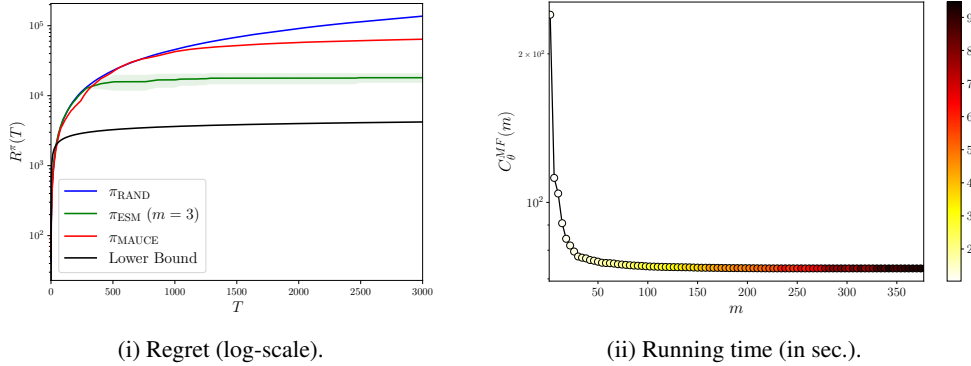

Figure 6: Results for the antenna tilt optimization experiments.

## 8 Conclusions

In this paper, we investigated the problem of regret minimization in MAMABs: we derived a regret lower bound, proposed approximations of it, and devised ESM, an algorithm trading off statistical and computational efficiency. We then assessed the performance of ESM on both synthetic examples and the antenna tilt optimization problem. Interesting future research directions include proposing efficient distributed implementations of ESM, quantifying on its communication complexity, and investigating representation learning problems in MAMABs where the underlying factor graph defining the reward is unknown and needs to be learned.

## Acknowledgement

This research was supported by the Wallenberg AI, Autonomous Systems and Software Program (WASP) funded by the Knut and Alice Wallenberg Foundation.

## References

- [1] MOSEK ApS. *The MOSEK optimization toolbox for MATLAB manual. Version 9.0*. 2019.
- [2] Eugenio Bargiacchi et al. “Learning to Coordinate with Coordination Graphs in Repeated Single-Stage Multi-Agent Decision Problems”. In: *Proc. of ICML*. 2018.
- [3] Eugenio Bargiacchi et al. “Multi-agent RMax for Multi-Agent Multi-Armed Bandits”. In: *Proc. of Adaptive and Learning Agents Worksh.* 2022.
- [4] Stephen Boyd and Lieven Vandenberghe. *Convex Optimization*. Cambridge University Press, 2004.
- [5] Stephen Boyd et al. *A tutorial on geometric programming*. Optimization and Engineering, 2004.
- [6] Shouyuan Chen et al. “Combinatorial Pure Exploration of Multi-Armed Bandits”. In: *Proc. of NeurIPS*. 2014.
- [7] Wei Chen, Yajun Wang, and Yang Yuan. “Combinatorial Multi-Armed Bandit: General Framework and Applications”. In: *Proc. of Mach. Learn. Res.* 2013.
- [8] Richard Combes, Stefan Magureanu, and Alexandre Proutiere. “Minimal Exploration in Structured Stochastic Bandits”. In: *Proc. of NeurIPS*. 2017.
- [9] Richard Combes and Alexandre Proutiere. “Unimodal bandits: Regret lower bounds and optimal algorithms”. In: *Proc. of ICML*. 2014.
- [10] Richard Combes et al. “Combinatorial Bandits Revisited”. In: *Proc. of NeurIPS*. 2015.
- [11] Richard Combes et al. “Learning to rank: Regret lower bounds and efficient algorithms”. In: *Proc. of SIGMETRICS*. 2015.
- [12] Thibaut Cuvelier, Richard Combes, and Eric Gourdin. “Asymptotically Optimal Strategies For Combinatorial Semi-Bandits in Polynomial Time”. In: *Proc. of ALT*. 2021.

- [13] Thibaut Cuvelier, Richard Combes, and Eric Gourdin. “Statistically Efficient, Polynomial-Time Algorithms for Combinatorial Semi-Bandits”. In: *Proc. ACM Meas. Anal. Comput. Syst.* (2021).
- [14] Rina Dechter. “Bucket Elimination: A Unifying Framework for Reasoning”. In: *Artif. Intell.* (1999).
- [15] Rina Dechter, Natalia Flerova, and Radu Marinescu. “Search Algorithms for M Best Solutions for Graphical Models”. In: AAAI Press, 2012.
- [16] Rémy Degenne and Vianney Perchet. “Combinatorial semi-bandit with known covariance”. In: *Proc. of NeurIPS*. 2016.
- [17] Steven Diamond and Stephen Boyd. “CVXPY: A Python-embedded modeling language for convex optimization”. In: *JMLR* (2016).
- [18] Todd L Graves and Tze Leung Lai. “Asymptotically efficient adaptive choice of control laws in controlled markov chains”. In: *SIAM journal on control and optimization* (1997).
- [19] Carlos Guestrin, Daphne Koller, and Ronald Parr. “Max-norm Projections for Factored MDPs”. In: *Proc. of IJCAI*. 2001.
- [20] Carlos Guestrin et al. “Efficient Solution Algorithms for Factored MDPs”. In: *J. Artif. Int. Res.* (2003).
- [21] Botao Hao, Tor Lattimore, and Csaba Szepesvári. “Adaptive Exploration in Linear Contextual Bandit”. In: *Proc. of AISTATS*. 2020.
- [22] Yassir Jedra and Alexandre Proutiere. “Optimal Best-arm Identification in Linear Bandits”. In: *Proc. of NeurIPS*. 2020.
- [23] Emilie Kaufmann. “Contributions to the Optimal Solution of Several Bandit Problems”. Habilitation à diriger des recherches. Université de Lille, Nov. 2020.
- [24] Branislav Kveton et al. “Tight Regret Bounds for Stochastic Combinatorial Semi-Bandits”. In: *PLMR*. Proceedings of Machine Learning Research. PMLR, 2015.
- [25] Tze Leung Lai and Herbert Robbins. “Asymptotically efficient adaptive allocation rules”. In: *Advances in applied mathematics* (1985).
- [26] E.L. Lawler. “A procedure for computing the k best solutions to discrete optimization problems and its application to the shortest path problem”. In: *Management Science* (1972).
- [27] Marloes Maathuis et al. *Handbook of Graphical Models*. CRC Press, Inc., 2018.
- [28] Stefan Magureanu, Richard Combes, and Alexandre Proutiere. “Lipschitz Bandits: Regret Lower Bound and Optimal Algorithms”. In: *Proc. of COLT*. 2014.
- [29] P.J. Modi. “Distributed constraint optimization for multiagent”. PhD thesis. University of Southern California, 2003.
- [30] D. Nilsson. “An Efficient Algorithm for Finding the M Most Probable Configurations in Probabilistic Expert Systems”. In: *Statistics and Computing* (1998).
- [31] Pierre Perrault et al. “Statistical Efficiency of Thompson Sampling for Combinatorial Semi-Bandits”. In: *Proc. of NeurIPS*. 2020.
- [32] Theodore Rappaport. *Wireless Communications: Principles and Practice*. Prentice Hall, 2001.
- [33] James Renegar. “A polynomial-time algorithm, based on Newton’s method, for linear programming”. In: *Mathematical Programming* (1988).
- [34] David Sonntag and Tommi Jaakkola. “On Iteratively Constraining the Marginal Polytope for Approximate Inference and MAP”. In: *Semantic Scholar* (2007).
- [35] Ruben Stranders et al. “DCOPs and bandits: exploration and exploitation in decentralised coordination”. In: *Proc. of AAMAS*. 2012.
- [36] Filippo Vannella, Alexandre Proutiere, and Jaeseong Jeong. “Best Arm Identification in Multi-Agent Multi-Armed Bandits”. In: *Proc. of ICML*. 2023.
- [37] Timothy Verstraeten et al. “Multi-Agent Thompson Sampling for Bandit Applications with Sparse Neighbourhood Structures”. In: *Scientific Reports* (2020).
- [38] Andrew Wagenmaker, Julian Katz-Samuels, and Kevin Jamieson. *Experimental Design for Regret Minimization in Linear Bandits*. 2020.
- [39] Martin Wainwright and Michael Jordan. *Graphical Models, Exponential Families, and Variational Inference*. Now Publishers Inc., 2008.
- [40] Siwei Wang and Wei Chen. “Thompson Sampling for Combinatorial Semi-Bandits”. In: *Proc. of ICML*. 2018.

# Appendix

## Contents

|          |                                                                 |           |
|----------|-----------------------------------------------------------------|-----------|
| <b>1</b> | <b>Introduction</b>                                             | <b>1</b>  |
| <b>2</b> | <b>Related Work</b>                                             | <b>2</b>  |
| <b>3</b> | <b>Problem Setting</b>                                          | <b>3</b>  |
| <b>4</b> | <b>Regret Lower Bound</b>                                       | <b>4</b>  |
| <b>5</b> | <b>Lower Bound Approximations</b>                               | <b>4</b>  |
| 5.1      | Variable reduction . . . . .                                    | 4         |
| 5.1.1    | Locally tree-like reduction . . . . .                           | 5         |
| 5.1.2    | $\psi$ -Mean-Field reduction . . . . .                          | 5         |
| 5.2      | Constraint reduction . . . . .                                  | 6         |
| <b>6</b> | <b>The ESM algorithm</b>                                        | <b>6</b>  |
| <b>7</b> | <b>Experiments</b>                                              | <b>8</b>  |
| 7.1      | Synthetic Experiments . . . . .                                 | 8         |
| 7.2      | Antenna tilt optimization . . . . .                             | 9         |
| <b>8</b> | <b>Conclusions</b>                                              | <b>10</b> |
| <b>A</b> | <b>Lower bound proofs</b>                                       | <b>14</b> |
| A.1      | Proof of Theorem 4.1 . . . . .                                  | 14        |
| A.2      | Proof of Lemma 5.1 . . . . .                                    | 15        |
| A.3      | Proof of Lemma 5.2 . . . . .                                    | 15        |
| A.4      | Proof of Lemma 5.3 . . . . .                                    | 16        |
| A.5      | Reformulation of the lower bound . . . . .                      | 16        |
| <b>B</b> | <b>Non-convexity of the classical mean-field approximation</b>  | <b>17</b> |
| <b>C</b> | <b>Technical lemmas</b>                                         | <b>18</b> |
| <b>D</b> | <b>Regret upper bound</b>                                       | <b>18</b> |
| <b>E</b> | <b>Connection to Combinatorial Semi-bandit Feedback Bandits</b> | <b>22</b> |
| <b>F</b> | <b>Constraint reduction</b>                                     | <b>23</b> |
| F.1      | Proof of Lemma 5.4 . . . . .                                    | 23        |
| <b>G</b> | <b>Variable Elimination and Factored Constraint Reduction</b>   | <b>24</b> |
| G.1      | Variable Elimination . . . . .                                  | 24        |

|          |                                                              |           |
|----------|--------------------------------------------------------------|-----------|
| G.2      | Factored Constraint Reduction . . . . .                      | 25        |
| G.3      | $m$ -BEST algorithm . . . . .                                | 27        |
| G.4      | Examples of optimal elimination orders . . . . .             | 27        |
| <b>H</b> | <b>Complexity results</b>                                    | <b>28</b> |
| <b>I</b> | <b>An algorithm for selecting <math>\mathcal{A}_0</math></b> | <b>28</b> |
| <b>J</b> | <b>MAMABs with specific graph structures</b>                 | <b>29</b> |
| J.1      | Acyclic factor graphs . . . . .                              | 29        |
| J.2      | Networked Bandits . . . . .                                  | 29        |
| J.3      | Reductions . . . . .                                         | 30        |
| <b>K</b> | <b>Experimental settings and additional experiments</b>      | <b>30</b> |
| K.1      | Tightness of locally-tree like approximation . . . . .       | 30        |
| K.2      | Varying $m$ experiments . . . . .                            | 31        |
| K.3      | Antenna tilt experiments simulation setting . . . . .        | 31        |
| K.4      | Local approximation for cyclic factor graphs . . . . .       | 32        |
| K.5      | Quantifying the approximation ratio . . . . .                | 32        |
| <b>L</b> | <b>Details on antenna tilt optimization experiments</b>      | <b>33</b> |
| <b>M</b> | <b>Extended literature review</b>                            | <b>34</b> |
| M.1      | MAMABs . . . . .                                             | 34        |
| M.2      | Combinatorial Semi-Bandit Feedback . . . . .                 | 34        |

## A Lower bound proofs

In this section, we present proofs for the regret lower bound (Th. 4.1) and for the lower bound variable reduction results (Lemma 5.1, Lemma 5.2, Lemma 5.3). The lower bound proof, presented in App. A.5, is a direct consequence of an analogous bound in the combinatorial semi-bandit feedback setting, first given in [10, Th. 1] and leverages general techniques for controlled Markov chains [18]. The approximations leverage methods for approximate inference in probabilistic graphical models [39, 27]. In addition, we presenting an alternative characterization of the lower bound in App. A.5.

### A.1 Proof of Theorem 4.1

*Proof.* Let  $\Theta = \{\theta \in \mathbb{R}^A : \exists(\theta_e(a_e))_{e \in [\rho], a_e \in \mathcal{A}}, \forall a \in \mathcal{A}, \theta(a) = \sum_{e \in [\rho]} \theta_e(a_e), a_\theta^*$  is unique $\}$ . As shown in App. E, the MAMAB problem is a particular case of combinatorial linear bandits with semi-bandit feedback. By interpreting the MAMAB problem in this setting, and using the Gaussian reward assumption, the result from [10, Th. 1] implies that  $C_\theta^*$  is the value of the following semi-infinite optimization problem:

$$\min_{v \in \mathbb{R}_{\geq 0}^A, \tilde{v} \in \tilde{\mathcal{V}}} \sum_{a \in \mathcal{A}} v_a \Delta(a) \quad (9)$$

$$\text{subject to } \inf_{\lambda \in B(\theta)} \left\{ \sum_{e \in [\rho]} \sum_{a_e \in \mathcal{A}_e} \tilde{v}_{e, a_e} (\theta_e(a_e) - \lambda_e(a_e))^2 \right\} \geq 1, \quad (10)$$

where  $\tilde{v}_{e, a_e} = \sum_{b \in \mathcal{A}: a_e = b_e} v_b$ , and the set of confusing parameters is defined as (here we use  $a^* = a_\theta^*$  for conciseness)

$$B(\theta) = \left\{ \lambda \in \Theta : \lambda_e(a_e^*) = \theta_e(a_e^*), \forall e \in [\rho] \text{ and } \exists a \neq a^* : \sum_{e \in [\rho]} \lambda_e(a_e) - \lambda_e(a_e^*) > 0 \right\},$$

Let us introduce for  $\kappa > 0$ , the set

$$B_\kappa(\theta) = \left\{ \lambda \in \Theta : \lambda_e(a_e^*) = \theta_e(a_e^*), \forall e \in [\rho] \text{ and } \exists a \neq a^* : \sum_{e \in [\rho]} \lambda_e(a_e) - \lambda_e(a_e^*) \geq \kappa \right\}.$$

The set  $B_\kappa$  can be decomposed as

$$B(\theta) = \bigcup_{\kappa > 0} \bigcup_{a \neq a_\theta^*} \underbrace{\left\{ \lambda \in B(\theta) : \sum_{e \in [\rho]} \lambda_e(a_e) - \theta_e(a_e^*) \geq \kappa \right\}}_{\triangleq B_{\kappa, a}(\theta)}, \quad (11)$$

and we have that The LHS of the optimization problem defining the constraints in (10) can be rewritten as

$$\inf_{\lambda \in B_\kappa(\theta)} \sum_{e \in [\rho], a_e \in \mathcal{A}_e} \tilde{v}_{e, a_e} (\theta_e(a_e) - \lambda_e(a_e))^2 = \min_{\kappa > 0} \min_{a \neq a^*} \inf_{\lambda \in B_{\kappa, a}(\theta)} \sum_{e \in [\rho], a_e \in \mathcal{A}_e} \tilde{v}_{e, a_e} (\theta_e(a_e) - \lambda_e(a_e))^2.$$

Now, the optimization problem  $\inf_{\lambda \in B_{\kappa, a}(\theta)} \sum_{e \in [\rho], a_e \in \mathcal{A}_e} \tilde{v}_{e, a_e} (\theta_e(a_e) - \lambda_e(a_e))^2$  is convex and satisfies Slater's conditions [4]. By solving the KKT system, and letting  $\kappa \rightarrow 0$ , it is possible to verify that:

$$\inf_{\lambda \in B_{\kappa, a}(\theta)} \sum_{e \in [\rho], a_e \in \mathcal{A}_e} \tilde{v}_{e, a_e} (\theta_e(a_e) - \lambda_e(a_e))^2 \xrightarrow{\kappa \rightarrow 0} \frac{\sum_{e \in [\rho]: a_e \neq a_e^*} \tilde{v}_{e, a_e}^{-1}}{\Delta(a)^2}.$$

The result follows directly by substituting the solution into the constraint on the LHS of 10, and by noting that the objective (9) can be rewritten,  $\forall \tilde{v} \in \tilde{\mathcal{V}}$ , as

$$\sum_{a \in \mathcal{A}} v_a \Delta(a) = \sum_{e \in [\rho], a_e \in \mathcal{A}_e} \tilde{v}_{e, a_e} (\theta_e(a_e^*) - \theta_e(a_e)).$$

□

## A.2 Proof of Lemma 5.1

*Proof.* The proof is a consequence of a fundamental result in probabilistic graphical models. More precisely, it stems from the equivalence between the so-called *marginal polytope* and *local polytope* described in [39, Prop. 4.1], for tree-structured factor graphs, described in the following paragraph.

Let  $\Lambda = \{\lambda \in [0, 1]^{|\mathcal{A}|} : \sum_{a \in \mathcal{A}} \lambda_a = 1\}$  be the  $|\mathcal{A}| - 1$ -dimensional simplex. Define the *marginal polytope* as

$$\tilde{\Lambda} = \left\{ \tilde{\lambda} \in \mathbb{R}_{\geq 0}^{\tilde{\mathcal{A}}} : \exists \lambda \in \Lambda : \forall e \in [\rho], a_e \in \mathcal{A}_e, \tilde{\lambda}_{e, a_e} = \sum_{b \in \mathcal{A}: b_e = a_e} \lambda_b \right\}, \quad (12)$$

and the *local polytope* is

$$\tilde{\Lambda}_L = \left\{ \tilde{\lambda} \in \mathbb{R}_{\geq 0}^{\tilde{\mathcal{A}}} : \exists \lambda \in [0, 1]^{K^N}, \forall e \in [\rho], i \in \mathcal{S}_e, \forall a_i \in \mathcal{A}_i, \tilde{\lambda}_{e, a_i} = \sum_{b_e \in \mathcal{A}_e: b_e \sim a_i} \lambda_{e, b_e} \right\}.$$

The following lemma states that the marginal polytope is an outer approximation of the local polytope, and that for acyclic factor graphs (see App. J for a formal definition), these two sets are equivalent.

**Lemma A.1** (Prop. 4.1, [39]). *The inclusion  $\tilde{\Lambda} \subseteq \tilde{\Lambda}_L$  holds for any factor graph. Additionally, for acyclic factor graphs, we have that  $\tilde{\Lambda} = \tilde{\Lambda}_L$ .*

The sets  $\tilde{\Lambda}$  and  $\tilde{\Lambda}_L$  are essentially equivalent to the *marginal cone*  $\tilde{\mathcal{V}}$  and *local cone*  $\tilde{\mathcal{V}}_L$ , respectively, when including the additional unitary constraint which enforces that the sum of the variables involved in the sets is 1. Lemma A.1, automatically implies that  $\mathcal{V} = \mathcal{V}_L$ , for MAMABs whose underlying factor graph is acyclic, and hence  $C_\theta^* = C_\theta^L$  holds. Instead, for MAMABs with generic factor graphs Lem A.1 implies that  $\tilde{\mathcal{V}} \subseteq \tilde{\mathcal{V}}_L$  and hence:

$$\left\{ \tilde{v} \in \tilde{\mathcal{V}} : \frac{\sum_{e \in [\rho]: a_e \neq a_e^*} \tilde{v}_{e, a_e}^{-1}}{\Delta(a)^2} \leq 1, \forall a \neq a^* \right\} \subseteq \left\{ \tilde{v} \in \tilde{\mathcal{V}}_L : \frac{\sum_{e \in [\rho]: a_e \neq a_e^*} \tilde{v}_{e, a_e}^{-1}}{\Delta(a)^2} \leq 1, \forall a \neq a^* \right\}.$$

Hence, the bound  $C_\theta^L \leq C_\theta^*$  follows by noting that for a function  $f$  and a pair of sets  $(\mathcal{X}, \mathcal{X}')$  such that  $\mathcal{X} \subseteq \mathcal{X}'$ , we have that  $\min_{x \in \mathcal{X}'} f(x) \leq \min_{x \in \mathcal{X}} f(x)$  (see e.g. [4]).  $\square$

## A.3 Proof of Lemma 5.2

*Proof.* Let  $\psi$  be any function. Recall the definitions of

$$\mathcal{V}_\psi = \{v \in \mathbb{R}_{\geq 0}^{\mathcal{A}} : \exists w \in \mathbb{R}_{\geq 0}^{K^N}, v_a = \psi_a(w), \forall a \neq a^*\}.$$

The  $\psi$ -MF cone is then defined as:

$$\tilde{\mathcal{V}}_{\psi\text{-MF}} = \left\{ \tilde{v} \in \mathbb{R}_{\geq 0}^{\tilde{\mathcal{A}}} : \exists v \in \mathcal{V}_\psi, \forall e \in [\rho], a_e \in \mathcal{A}_e, \tilde{v}_{e, a_e} = \sum_{b \in \mathcal{A} \setminus \{a_\theta^*\}: b_e = a_e} v_b \right\}.$$

It is immediate to check that for any  $\psi$ , we have that  $\tilde{\mathcal{V}}_{\psi\text{-MF}} \subseteq \tilde{\mathcal{V}}$ , and hence

$$\left\{ \tilde{v} \in \tilde{\mathcal{V}}_{\psi\text{-MF}} : \frac{\sum_{e \in [\rho]: a_e \neq a_e^*} \tilde{v}_{e, a_e}^{-1}}{\Delta(a)^2} \leq 1, \forall a \neq a^* \right\} \subseteq \left\{ \tilde{v} \in \tilde{\mathcal{V}} : \frac{\sum_{e \in [\rho]: a_e \neq a_e^*} \tilde{v}_{e, a_e}^{-1}}{\Delta(a)^2} \leq 1, \forall a \neq a^* \right\}.$$

By a similar argument to Lemma 5.1 we conclude that  $C_\theta^* \leq C_\theta^{\psi\text{-MF}}$ .  $\square$

#### A.4 Proof of Lemma 5.3

*Proof.* We first show that  $C_\theta^{\text{MF}} = C_\theta^{\psi\text{-MF}}$  can be written in terms of  $w$  only for the choice of  $\psi$  such that  $\psi_a(w) = \sum_{i \in [N]} w_{i,a_i}, \forall a \in \mathcal{A}$ . Let us denote  $\tilde{\mathcal{V}}_{\psi\text{-MF}} = \tilde{\mathcal{V}}_{\text{MF}}$ . By definition, we can check that any  $\tilde{v} \in \tilde{\mathcal{V}}_{\text{MF}}$  satisfies

$$\tilde{v}_{e,a_e} = \sum_{b \in \mathcal{A}: b_e = a_e} w_b = \sum_{b \in \mathcal{A}: b_e = a_e} \sum_{i \in [N]} w_{i,b_i} = K^{N-|S_e|} \sum_{i \in S_e} w_{i,a_i} + K^{N-|S_e|-1} \sum_{i \notin S_e, a_i \in \mathcal{A}_i} w_{i,a_i}. \quad (13)$$

As  $\tilde{v}$  can be uniquely written in terms of local variables  $(w_i)_{i \in [N]}$ , by substituting (13) it into (5), note that the resulting optimization problem involves only local variables.

Next, we show that, for any  $\theta$  and  $\psi$ ,  $C_\theta^{\psi\text{-MF}} \leq \rho \Delta_{\min}^{-2} \sum_{e \in [\rho], a_e \in \mathcal{A}_e} (\theta_e(a_e^*) - \theta_e(a_e))$ . The bound is obtained by adapting [12, Lemma 9], [10, Corollary 1]. First, note that  $\tilde{v} \in \tilde{\mathcal{V}}$  such that  $\tilde{v}_{e,a_e} = \frac{\rho}{\Delta_{\min}^2}, \forall e \in [\rho], a_e \in \mathcal{A}_e$  is a feasible solution to (1), as for this  $\tilde{v}$ , it holds that

$$\sum_{e \in [\rho]: a_e \neq a_e^*} \tilde{v}_{e,a_e}^{-1} = \frac{\Delta_{\min}^2}{\rho} \sum_{e \in [\rho]} \mathbb{1}_{\{a_e \neq a_e^*\}} \leq \Delta_{\min}^2 \leq \Delta(a)^2.$$

Hence, by substitution into the objective of (5), we get the result:

$$\sum_{e \in [\rho], a_e \in \mathcal{A}_e} \tilde{v}_{a_e} (\theta_e(a_e^*) - \theta_e(a_e)) \leq \frac{\rho \sum_{e \in [\rho], a_e \in \mathcal{A}_e} (\theta_e(a_e^*) - \theta_e(a_e))}{\Delta_{\min}^2}.$$

□

#### A.5 Reformulation of the lower bound

The following lemma provides an alternative characterization of the lower bound (1) in terms of a min-max optimization problem with variables over the marginal polytope  $\tilde{\Lambda}$  introduced in App. A.2. The reformulation is similar to the analogous one in the plain-bandit literature [23].

**Lemma A.2.** *For any  $\theta$ ,  $C_\theta^*$  is the value of the following convex optimization problem*

$$C_\theta^* = \inf_{\tilde{\lambda} \in \tilde{\Lambda}} \max_{a \neq a_\theta^*} \frac{\sum_{e \in [\rho]: a_e \neq a_e^*} \tilde{\lambda}_{e,a_e}^{-1}}{\Delta(a)^2} \sum_{e \in [\rho], a_e \in \mathcal{A}_e} \tilde{\lambda}_{e,a_e} (\theta_e(a_e^*) - \theta_e(a_e)). \quad (14)$$

*Proof.* The proof follows similar steps to [23, Thm. 1.8], which proves the result in the plain bandit setting. Define the set of feasible solutions for the lower bound problem (1) as:

$$\mathcal{F}(\theta) = \left\{ \tilde{v} \in \tilde{\mathcal{V}} : \frac{\sum_{e \in [\rho]: a_e \neq a_e^*} \tilde{v}_{e,a_e}^{-1}}{\Delta(a)^2} \leq 1, \forall a \neq a_\theta^* \right\},$$

Note that, if  $\tilde{\lambda} \in \tilde{\Lambda}$ , any  $\tilde{v}$  such that  $\forall a \neq a_\theta^*, \tilde{v}_{e,a_e} = \frac{\sum_{e \in [\rho]: b_e \neq a_e^*} \tilde{\lambda}_{e,b_e}^{-1}}{\tilde{\lambda}_{e,a_e} \Delta(a)^2}$ , is such that  $\tilde{v} \in \mathcal{F}(\theta)$ . This, in turn, implies that

$$(14) = \inf_{\tilde{\lambda} \in \tilde{\Lambda}} \max_{a \neq a_\theta^*} \frac{\sum_{e \in [\rho], a_e \in \mathcal{A}_e} \tilde{\lambda}_{e,a_e} (\theta_e(a_e^*) - \theta_e(a_e))}{\frac{\sum_{e \in [\rho]: b_e \neq a_e^*} \tilde{\lambda}_{e,b_e}^{-1}}{\Delta(a)^2}} \geq \inf_{\tilde{v} \in \mathcal{F}(\theta)} \sum_{e \in [\rho], a_e \in \mathcal{A}_e} \tilde{v}_{e,a_e} (\theta_e(a_e^*) - \theta_e(a_e)).$$

On the other hand, we have that if  $\tilde{v} \in \mathcal{F}(\theta)$ , any  $\tilde{\lambda}$ , such that for all  $a \neq a_\theta^*$

$$\tilde{\lambda}_{e,a_e} = \frac{\tilde{v}_{e,a_e}}{\sum_{e \in [\rho]: b_e \neq a_e^*} \tilde{v}_{e,b_e}}$$

is such that  $\tilde{v} \in \mathcal{V}$ , which in turn, yields

$$\inf_{\tilde{v} \in \mathcal{F}(\theta)} \sum_{e \in [\rho], a_e \in \mathcal{A}_e} \tilde{v}_{e,a_e} (\theta_e(a_e^*) - \theta_e(a_e)) \geq \inf_{\tilde{v} \in \mathcal{F}(\theta)} \frac{\sum_{e \in [\rho], b_e \in \mathcal{A}_e} \tilde{\lambda}_{e,b_e} (\theta_e(a_e^*) - \theta_e(a_e))}{\frac{\sum_{e \in [\rho]: a_e \neq a_e^*} \tilde{\lambda}_{e,b_e}^{-1}}{\Delta(a)^2}} = (14)$$

□



## B Non-convexity of the classical mean-field approximation

In this appendix, we establish that leveraging a classical mean-field approximation for  $C_\theta^{\psi\text{-MF}}$  leads to a non-convex program. The conventional MF approximation [39] consists in selecting  $\psi(w) = \prod_{i \in [N]} w_{i, a_i}$ , for all  $a \neq a^*$ . This choice results in a Signomial Program (SP) for  $C_\theta^{\psi\text{-MF}}$ , a specific type of non-convex optimization problem that is hard to solve efficiently [5]. We summarize this fact in the following lemma.

**Lemma B.1.** *Let  $\psi(w) = \prod_{i \in [N]} w_{i, a_i}$ ,  $\forall a \neq a^*$ . Then  $C_\theta^{\psi\text{-MF}}$  is the value of the following signomial program:*

$$\min_{w \in \mathbb{R}_{\geq 0}^{KN}} \sum_{e \in [\rho], a_e \in \mathcal{A}_e} \zeta_{e, a_e}(w) (\theta_e(a_e^*) - \theta_e(a_e)) \quad \text{s.t.} \quad \sum_{e \in [\rho]: a_e \neq a_e^*} \zeta_{e, a_e}^{-1}(w) \leq \Delta(a)^2, \forall a \in \mathcal{A}, \quad (15)$$

where  $\zeta_{e, a_e}(w) = \prod_{i \in \mathcal{S}_e} w_{i, a_i} \prod_{j \notin \mathcal{S}_e} \left( \sum_{a_j \in \mathcal{A}_j} w_{j, a_j} \right)$ ,  $\forall e \in [\rho], a_e \in \mathcal{A}_e$ .

*Proof.* Recall that, an SP in standard form (for variables  $x \in \mathbb{R}_{> 0}^I$ ) is described as [5, Sec. 9]:

$$\begin{aligned} \inf_x \quad & f(x) \\ \text{s.t.} \quad & g_i(x) \leq 1, \quad i = 1, \dots, m \\ & h_i(x) = 1, \quad i = 1, \dots, p \end{aligned} \quad (16)$$

where  $f, (g_i)_{i \in [m]}$  and  $(h_i)_{i \in [p]}$  are *signomials*. Recall that for  $x \in \mathbb{R}_{> 0}^I$ , a signomial  $F$  is a function of the type  $F(x) = \sum_{j \in [J]} \xi_j \prod_{i \in [I]} x_i^{\beta_{i,j}}$ , for some  $\beta \in \mathbb{R}^{I \times J}$  and  $\xi \in \mathbb{R}^J$ .

Now, we will show that (16) can be described as an SP in standard form in terms of local variables  $w \in \mathbb{R}_{> 0}^{KN}$ . By definition any  $\tilde{v} \in \tilde{\mathcal{V}}_{\psi\text{-MF}}$  can be written as:

$$\tilde{v}_{e, a_e} = \sum_{b \in \mathcal{A}: b_e = a_e} w_b = \sum_{b \in \mathcal{A}: b_e = a_e} \prod_{i \in [N]} w_{i, b_i} = \prod_{i \in \mathcal{S}_e} w_{i, b_i} \prod_{j \notin \mathcal{S}_e} \left( \sum_{a_j \in \mathcal{A}_j} w_{j, a_j} \right) = \zeta_{e, a_e}(w) \quad (17)$$

The RHS of (17) is clearly a posynomial, in the local variables  $w \in \mathbb{R}_{> 0}^{KN}$ . Also, as each  $\tilde{v}_{e, a_e}$  is uniquely determined by  $w$ , we denote (17) by  $\zeta_{e, a_e}(w)$ , and define  $\zeta(w) = (\zeta_{e, a_e}(w))_{e \in [\rho], a_e \in \mathcal{A}_e}$ . Now, the objective of (15) is naturally a signomial in  $w$  (note that  $\theta_e(a_e^*) - \theta_e(a_e)$  can be negative), as signomials are closed under addition and multiplication. The inequality constraints (15) can be written also in terms of  $\zeta(w)$  and yields a posynomial in  $w$ .  $\square$

*Remark B.2 (Impossibility of reduction to GP).* SPs are a generalization of GPs which are much harder to solve. Indeed GPs can be transformed into convex optimization programs, while only local solutions can be found efficiently for SPs [5]. Boyd et al. [5, Sec. 9.1] presents a set of conditions under which this transformation is possible. Specifically, the SP is first transformed into a Geometric Program (GP) through a set of relaxations and change of variables, which in turn is equivalent to a convex optimization problem. Unfortunately, for (15), it is easy to check that these conditions do not hold when selecting  $\psi(w) = \prod_{i \in [N]} w_{i, a_i}$  in the  $\psi$ -MF approximation, which is a natural choice in approximate inference methods [39]a.

## C Technical lemmas

In this appendix, we state a set of technical lemmas useful to prove the regret upper bound. Specifically, in Lemma C.1, we state and adaptation of a concentration result first proposed in Lipschitz bandits [28] (Theorem 2) and then repurposed for combinatorial bandits in [10] (Lemma 1) and for general structured bandits in [8].

**Lemma C.1.** *There exists a constant  $M(\gamma, \rho) > 0$  depending only on  $\rho$  and  $\gamma$  such that, for any  $\theta$ , and for all  $t \geq 2$  satisfies*

$$\sum_{t=1}^{\infty} \mathbb{P} \left[ \sum_{e \in [\rho], a_e \in \mathcal{A}_e} N_{t,e,a_e} \text{kl}(\hat{\theta}_{t,e,a_e}, \theta_e(a_e)) \geq (1 + \gamma) \log(t) \right] \leq M(\gamma, \rho),$$

where  $\text{kl}(a, b)$  denotes the kl divergence between two Gaussian distributions with means  $a$  and  $b$ .

Next, in Lemma C.2 we present a result that allows to bound the size of a set of rounds in which a group action  $a_e$  is selected and a group parameter  $\theta_e(a_e)$  is not estimated accurately. It was first proposed for unimodal bandits [9] but is a result holding for general structured bandit problems [8].

**Lemma C.2.** *Let  $a \in \mathcal{A}$  and  $\varepsilon > 0$ . Let  $\mathcal{F}_t$  be the  $\sigma$ -algebra generated by  $(r_{s,a})_{s \in [t]}$ . Let  $\mathcal{T} \subset \mathbb{N}$  be a random set of rounds. Assume that there exists a sequence of (random) sets  $(\mathcal{T}(s))_{s \geq 1}$  such that (i)  $\mathcal{T} \subset \cup_{s \in [t]} \mathcal{T}(s)$ , (ii) for all  $s \geq 1$  and  $t \in \mathcal{T}(s)$ ,  $N_{t,e,a_e} \geq \varepsilon s$ ,  $\forall e \in [\rho]$  (iii)  $|\mathcal{T}(s)| \leq 1$ , and (iv) the event  $t \in \mathcal{T}(s)$  is  $\mathcal{F}_t$ -measurable. Then, for all  $\delta > 0$ ,*

$$\sum_{t=1}^{\infty} \mathbb{P} \left[ t \in \mathcal{T}, \left| \sum_{e \in [\rho]} \hat{\theta}_{t,e,a_e} - \theta_e(a_e) \right| > \delta \right] \leq \frac{1}{\varepsilon \delta^2}.$$

Finally, in Lemma C.3, we report a result on the continuity of the functions related to the lower bound optimization problems and approximations. The result was first derived for the general structured bandit problem [8] and holds for MAMABs. Define  $\tilde{v}^\diamond(m, \theta)$ , the variables attaining  $C_\theta^\diamond(m)$  for any  $\theta$  and  $m \in [K^N - 1]$ .

In order to simplify the proofs, and w.l.o.g., in the following we shall assume that  $\tilde{v}^\diamond(m, \theta)$  is unique, i.e., the problem (1) admits a unique solution. Note that if this was not the case, one may reason in terms of the objective function as in [22] for linear bandits. Furthermore, to simplify notations, we will omit the dependency of  $m$  from  $\tilde{v}^\diamond(m, \theta)$  and  $C_\theta^\diamond(m)$ , implying that the result holds for any  $m \in [K^N - 1]$ .

**Lemma C.3.** *Let  $\diamond \in \{L, MF\}$ . The optimal value of (1),  $\theta \rightarrow C_\theta^\diamond$  is continuous. If  $C_\theta^\diamond$  admits a unique solution,  $\tilde{v}^\diamond(\theta) = (\tilde{v}_{e,a_e}^\diamond(\theta))_{e \in [\rho], a_e \in \mathcal{A}_e}$  at  $\theta$ , then  $\theta \rightarrow \tilde{v}^\diamond(\theta)$  is continuous at  $\theta$ .*

## D Regret upper bound

The proof for the regret upper bound consists in bounding the number of times a sub-optimal global action  $a \neq a_\theta^*$  is selected in the various phases of the algorithm. It is similar to the corresponding upper bound proof for OSSB [10, Th. 1]. The main difference is that the exploitation condition is based on group variables  $\tilde{v}^\diamond \in \tilde{\mathcal{V}}_\diamond$ , instead of global variables  $v \in \mathbb{R}_{\geq 0}^A$ .

For a parameter  $\theta$ , and  $\diamond \in \{L, MF\}$  let  $\tilde{v}^\diamond(\theta) = (\tilde{v}_{e,a_e}^\diamond)_{e \in [\rho], a_e \in \mathcal{A}_e}$  be the group variable vector solution of  $C_\theta^\diamond$ . We also denote by  $\tilde{v}_t^\diamond = (\tilde{v}_{t,e,a_e}^\diamond)_{e \in [\rho], a_e \in \mathcal{A}_e}$  the group variable vector solution of  $C_{\theta_t}^\diamond$ . Define  $\psi^\diamond(\theta) = \tilde{A} \|\tilde{v}^\diamond(\theta)\|_\infty \sum_{e \in [\rho], a_e \in \mathcal{A}_e} (\theta_e(a_e^*) - \theta_e(a_e))$ . In this section, we use the following definition for the  $\infty$  norm for the parameter  $\theta$ :  $\|\theta\|_\infty = \max_{e \in [\rho], a_e \in \mathcal{A}_e} |\theta_e(a_e)|$ . Let  $(\kappa, \delta(\kappa))$  be such that, for all  $\lambda \in \Theta$  verifying  $\|\theta - \lambda\|_\infty \leq \delta(\kappa)$ , the following holds:

$$\begin{aligned} C_\lambda^\diamond &\leq (1 + \kappa) C_\theta^\diamond, \\ \psi^\diamond(\lambda) &\leq 2\psi^\diamond(\theta), \\ a_\theta^* &= a_\lambda^*. \end{aligned}$$

By Lemma C.3 such  $\delta(\kappa)$  exist.

For any  $\theta$  and  $\chi > 0$ , define

$$\Gamma(\theta, \chi) = \{\lambda \in \Theta : |\theta(a_\theta^*) - \theta(a_\lambda^*)| \leq \chi, a_\theta^* \neq a_\lambda^*\}. \quad (18)$$

To prove the upper bound, we further need to state the following assumption:

**Assumption D.1.** For any  $\theta$ ,  $\exists \chi(\theta) > 0$  s.t. if  $\lambda \in \Gamma(\theta, \chi(\theta))$ , there exists a parameter  $\pi \in B(\lambda)$ ,  $\forall e \in [\rho], \forall a_e \in \mathcal{A}_e$  such that

$$\text{kl}(\theta_e(a_e), \lambda_e(a_e)) \geq \text{kl}(\pi_e(a_e), \lambda_e(a_e)) - \frac{1}{2M^\diamond \bar{A}},$$

where  $M^\diamond$  is an upper bound of  $\sup_{\theta \in \Theta} \|\tilde{v}^\diamond(\theta)\|_\infty$ .

**Exploitation.** In this phase, ESM selects the best estimated global action  $a_t = a_{\hat{\theta}_t}^*$ . Let  $a \neq a_{\hat{\theta}_t}^*$  be a sub-optimal action, and define the event:

$$\mathcal{E}_a(t) = \left\{ a_t = a_{\hat{\theta}_t}^* = a, N_{t,e,a_e} \text{kl}(\hat{\theta}_{t,e,a_e}, \theta_e(a_e)) \geq (1 + \gamma) \log(t), \forall e \in [\rho], a_e \in \mathcal{A}_e \right\}.$$

Let  $\chi > 0$  be a constant satisfying Assumption D.1. We decompose this event as

$$\begin{aligned} \mathcal{E}_{a,1}(t) &= \mathcal{E}_a(t) \cap \left\{ \left| \sum_{e \in [\rho]} \theta_e(a_e) - \hat{\theta}_{t,e,a_e} \right| > \chi \right\}, \\ \mathcal{E}_{a,2}(t) &= \mathcal{E}_a(t) \cap \left\{ \left| \sum_{e \in [\rho]} \theta_e(a_e) - \hat{\theta}_{t,e,a_e} \right| \leq \chi \right\}. \end{aligned}$$

Applying Lemma C.2, we have that

$$\sum_{t=1}^{\infty} \mathbb{P}(\mathcal{E}_{a,1}(t)) \leq \frac{1}{\chi^2}. \quad (19)$$

Now, assume that  $\mathcal{E}_{a,2}(t)$  holds. We can write:

$$\begin{aligned} & \sum_{e \in [\rho], a_e \in \mathcal{A}_e} N_{t,e,a_e} \text{kl}(\hat{\theta}_{t,e,a_e}, \theta_e(a_e)) \\ & \stackrel{(i)}{\geq} (1 + \gamma) \log(t) \sum_{e \in [\rho], a_e \in \mathcal{A}_e} \tilde{v}_{t,e,a_e}^\diamond \text{kl}(\hat{\theta}_{t,e,a_e}, \theta_e(a_e)) \\ & \stackrel{(ii)}{\geq} (1 + \gamma) \log(t) \sum_{e \in [\rho], a_e \in \mathcal{A}_e} \tilde{v}_{t,e,a_e}^\diamond \left( \text{kl}(\hat{\theta}_{t,e,a_e}, \pi_e(a_e)) - \frac{1}{2M^\diamond \bar{A}} \right) \\ & \stackrel{(iii)}{\geq} (1 + \gamma) \log(t) \left( 1 - \sum_{e \in [\rho], a_e \in \mathcal{A}_e} \tilde{v}_{t,e,a_e}^\diamond \frac{1}{2M^\diamond \bar{A}} \right) \\ & \geq (1 + \gamma) \frac{\log(t)}{2}, \end{aligned}$$

where (i) holds as we are in the exploitation phase, and hence the condition  $N_{t,e,a_e} \geq \tilde{v}_{t,e,a_e}^\diamond (1 + \gamma) \log(t)$ , holds for all  $e \in [\rho], a_e \in \mathcal{A}_e$ ; (ii) follows from Assumption D.1 which states that there exists a parameter  $\pi \in B(\hat{\theta}_t)$  such that  $\text{kl}(\theta_e(a_e), \lambda_e(a_e)) \geq \text{kl}(\pi_e(a_e), \lambda_e(a_e)) - \frac{1}{2M^\diamond \bar{A}}$ ; (iii) follows as  $\pi \in B(\hat{\theta}_t)$ .

We have hence shown that

$$\mathcal{E}_{a,2}(t) \subset \left\{ \sum_{e, a_e} N_{t,e,a_e} \text{kl}(\hat{\theta}_{t,e,a_e}, \theta_e(a_e)) \geq (1 + \gamma) \frac{\log(t)}{2} \right\}.$$

From Lemma C.1, we have that:

$$\sum_{t=1}^{\infty} \mathbb{P}(\mathcal{E}_{a,2}(t)) \leq G(\gamma, \rho). \quad (20)$$

Let  $\mathcal{E}(t) = \cup_{a \neq a^*} \mathcal{E}_a(t)$ . Then, combining (19), (20), we conclude that

$$\sum_{t=1}^{\infty} \mathbb{P}(\mathcal{E}(t)) \leq |\mathcal{A}| \left( G(\gamma, \rho) + \frac{1}{\chi^2} \right). \quad (21)$$

**Certainty equivalence.** We now consider the case in which  $\theta$  is not estimated accurately enough and a sub-optimal action is selected. Define the event:

$$\mathcal{F}(t) = \left\{ a_t \neq a_{\hat{\theta}}^*, \exists e \in [\rho], a_e \in \mathcal{A}_e : N_{t,e,a_e} < (1 + \gamma) \tilde{v}_{t,e,a_e}^{\diamond} \log(t), \|\theta - \hat{\theta}_t\|_{\infty} > \delta(\kappa) \right\}.$$

$\mathcal{F}(t)$  is the event that a sub-optimal action is selected, that we are not in the exploitation phase, and that  $\theta$  is not estimated accurately. Let  $\mathcal{F}_{e,a_e}(t) = \mathcal{F}(t) \cap \{|\hat{\theta}_{t,e,a_e} - \theta_e(a_e)| > \delta(\kappa)\}$  so that  $\mathcal{F}(t) = \cup_{e,a_e} \mathcal{F}_{e,a_e}(t)$ . We now show by contradiction that, if  $\mathcal{F}(t)$  occurs, then  $\min_{e,a_e} N_{t,e,a_e} \geq \varepsilon s_t/2$ , for  $\varepsilon < 1/|\mathcal{A}_0|$ , where we recall that  $s_t$  is the number of times in which ESM is not in the exploitation phase up to round  $t$ .

Assume that this does not hold, then there exist at least  $p = \lceil s(t)/2 \rceil$  rounds  $\{t_1, \dots, t_p\}$  where  $\min_{e,a_e} N_{t_i,e,a_e} \leq \varepsilon s_{t_i}$ , for all  $i \in [p]$ . After  $|\mathcal{A}_0|$  such rounds  $\min_{e,a_e} N_{t_i,e,a_e}$  is increased of at least 1. This implies that  $N_{t_i,e,a_e} \geq \frac{s_{t_i}}{2|\mathcal{A}_0|}$ , but this is a contradiction for  $\varepsilon < 1/|\mathcal{A}_0|$ . Therefore, if  $\mathcal{F}(t)$  occurs, then we have both  $\min_{e \in [\rho], a_e \in \mathcal{A}_e} N_{t,e,a_e} \geq \frac{\varepsilon s_t}{2}$  and  $\|\theta - \hat{\theta}_t\|_{\infty} > \delta(\kappa)$ . By using a union bound and Lemma C.2, we have that

$$\sum_{t=1}^{\infty} \mathbb{P}(\mathcal{F}(t)) \leq \sum_{t=1}^{\infty} \sum_{e \in [\rho], a_e \in \mathcal{A}_e} \mathbb{P}(\mathcal{F}_{e,a_e}(t)) \leq \frac{2\tilde{A}}{\varepsilon \delta(\kappa)^2}. \quad (22)$$

**Estimation and exploration.** Now we consider the case in which  $\theta$  is accurately estimated and we are not in the exploitation phase. Let

$$\mathcal{G}(t) = \left\{ \exists e \in [\rho], a_e \in \mathcal{A}_e : N_{t,e,a_e} < (1 + \gamma) \tilde{v}_{t,e,a_e}^{\diamond} \log(t), \|\theta - \hat{\theta}_t\|_{\infty} \leq \delta(\kappa) \right\}.$$

Hence, if  $\mathcal{G}(t)$  occurs, then we know that ESM selects action according to the estimation or exploration phase. Assume that  $\mathcal{G}(t)$  occurs and that  $a_t = a$ .

We first upper bound  $s_t$  for these two cases.

(i) **Estimation:** In this case

$$a_t = a \in \mathcal{A}_0 : a_{t,e'} = b_{e'} \text{ with } (e', b_{e'}) \in \arg \min_{e', a_{e'}} N_{t,e,a_e}.$$

Then we have that  $N_{t,e,a_e} \leq \min_{e', b_{e'}} N_{t,e',b_{e'}}$ . Furthermore, since ESM is not in the exploitation phase, we have that there exist  $e', a'_{e'}$  such that

$$N_{t,e',a'_{e'}} \leq \tilde{v}_{t,e',a'_{e'}}^{\diamond} (1 + \gamma) \log(t) \leq \|\tilde{v}_t^{\diamond}\|_{\infty} (1 + \gamma) \log(T).$$

Hence we have that  $N_{t,e,a_e} \leq \|\tilde{v}_t^{\diamond}\|_{\infty} (1 + \gamma) \log(T)$ .

(ii) **Exploration:** In this case

$$a_t \in \mathcal{A} : a_{t,e'} = b_{e'} \text{ with } (e', b_{e'}) \in \arg \min_{e', a_{e'}} \frac{N_{t,e,a_e}}{\tilde{v}_{t,e,a_e}^{\diamond}}.$$

Then  $N_{t,e,a_e} \leq \tilde{v}_{t,e,a_e}^{\diamond} (1 + \gamma) \log(t) \leq \|\tilde{v}_t^{\diamond}\|_{\infty} (1 + \gamma) \log(T)$ .

Hence in both cases we get  $N_{t,e,a_e} \leq \|\tilde{v}_t^\diamond\|_\infty (1 + \gamma) \log(t)$ . Now, since  $s_t$  is incremented each time  $\mathcal{G}(t)$  occurs, we conclude that  $s_t \leq \tilde{A} \|\tilde{v}_t^\diamond\|_\infty (1 + \gamma) \log(T)$ .

We can now bound the number of times  $a_e$  is selected in both phases. If  $a_e$  is selected in the estimation phase, we have:

$$N_{t,e,a_e} \leq \varepsilon s_t \leq \varepsilon \tilde{A} \|\tilde{v}_t^\diamond\|_\infty (1 + \gamma) \log(t).$$

Instead, when  $a_e$  is selected in the exploration phase, we have that:

$$N_{t,e,a_e} \leq \tilde{v}_{t,e,a_e}^\diamond (1 + \gamma) \log(T),$$

We deduce that

$$\sum_{t=1}^T \mathbb{1}_{\{a_{t,e}=a_e, \mathcal{G}(t)\}} \leq (\tilde{v}_{\tau,e,a_e}^\diamond + \varepsilon \tilde{A} \|\tilde{v}_\tau^\diamond\|_\infty) (1 + \gamma) \log(T),$$

where  $\tau \leq T$  is the last random round such that  $a_{\tau,e} = a_e$  and  $\mathcal{G}(\tau)$  holds. The fact  $\mathcal{G}(\tau)$  occurs, implies that  $\|\hat{\theta}_\tau - \theta\|_\infty \leq \delta(\kappa)$  holds, and we have

$$\begin{aligned} \sum_{e \in [\rho], a_e \in \mathcal{A}_e} \tilde{v}_{\tau,e,a_e}^\diamond (\theta_e(a_e^*) - \theta_e(a_e)) &\leq (1 + \kappa) C_\theta^\diamond, \\ \varepsilon |\mathcal{A}_0| \|\tilde{v}_\tau^\diamond\|_\infty \sum_{e \in [\rho], a_e \in \mathcal{A}_e} (\theta_e(a_e^*) - \theta_e(a_e)) &\leq 2\varepsilon \psi^\diamond(\theta), \end{aligned}$$

This event yield regret:

$$Y(T) = \sum_{t=1}^T \sum_{e \in [\rho], a_e \in \mathcal{A}_e} (\theta_e(a_e^*) - \theta_e(a_e)) \mathbb{1}_{\{a_{t,e}=a_e, \mathcal{G}(t)\}}.$$

Hence, we conclude that

$$Y(T) \leq ((1 + \kappa) C_\theta^\diamond + 2\varepsilon \psi^\diamond(\theta)) (1 + \gamma) \log(T). \quad (23)$$

**Regret upper bound.** By combining (21)-(22)-(23), we have:

$$\begin{aligned} R^\pi(T) &\leq \mathbb{E}[Y(T)] + \theta(a^*) \left( \sum_{t=1}^{\infty} \mathbb{P}(\mathcal{E}(t)) + \mathbb{P}(\mathcal{F}(t)) \right) \\ &\leq ((1 + \kappa) C_\theta^\diamond + 2\varepsilon \psi^\diamond(\theta) (1 + \gamma)) \log(T) + \theta(a^*) \left( |\mathcal{A}| \left( G(\gamma, \rho) + \frac{1}{\chi^2} \right) + \frac{2\tilde{A}}{\varepsilon \delta(\kappa)^2} \right), \end{aligned}$$

which in turn implies

$$\limsup_{T \rightarrow \infty} \frac{R^\pi(T)}{\log(T)} \leq ((1 + \kappa) C_\theta^\diamond + 2\varepsilon \psi^\diamond(\theta)) (1 + \gamma).$$

As, the above holds for all  $\kappa > 0$  we get the result:

$$\limsup_{T \rightarrow \infty} \frac{R^\pi(T)}{\log(T)} \leq (C_\theta^\diamond + 2\varepsilon \psi^\diamond(\theta)) (1 + \gamma).$$

## E Connection to Combinatorial Semi-bandit Feedback Bandits

The MAMAB setting can be regarded as a specific instance of a combinatorial semi-bandit feedback setting [13, 12, 38]. In the following, we present an equivalent characterization of the MAMAB problem to clarify its connection to the combinatorial semi-bandit feedback setting.

We first describe the interaction model in the generic (linear) combinatorial semi-bandit feedback setting. In such a setting, at each round  $t \geq 1$ , the learner selects an action from a combinatorial set  $a_t \in \{0, 1\}^d$ , and, given an unknown parameter  $\tilde{\theta} \in \mathbb{R}^d$ , she observes:

$$r_{t,i} = \tilde{\theta}_i + \eta_{t,i}, \forall i \in [d] : a_{t,i} = 1,$$

where  $\eta_{t,i} \sim \mathcal{N}(0, 1)$ , for all  $i \in [d]$ , are i.i.d. Gaussian noise samples (over rounds).

Since in MAMAB the set of global actions is defined as  $\mathcal{A} = \times_{i \in [N]} \mathcal{A}_i$ , the problem is not directly interpretable in the semi-bandit feedback setting. We show that a simple map from actions in  $\mathcal{A}$  to binary vectors in the  $\tilde{A}$ -dimensional space can reduce the MAMAB problem to a problem in the semi-bandit feedback setting.

Let  $\phi(\cdot) : \mathcal{A} \rightarrow \{0, 1\}^{\tilde{A}}$  be a function mapping global actions to binary vectors in the  $\tilde{A}$ -dimensional space. In MAMAB, the vector  $\phi$  has a block structure: it can be decomposed as  $\phi(a) = (\phi_e(b_e))_{e \in [\rho], b_e \in \mathcal{A}_e}$ , where  $\phi_e(b_e) \in \{0, 1\}^{\tilde{A}_e}$  is a group vector  $\phi_e(b_e) = 1_{\{a_e = b_e\}}$ , i.e., containing 1 in correspondence of the activated group action  $a_e$ . Further define  $\tilde{\theta} = (\theta_e(a_e))_{e \in [\rho], a_e \in \mathcal{A}_e} \in \mathbb{R}^{\tilde{A}}$ , i.e.,  $\tilde{\theta}$  is the vector containing the local mean parameters. At round  $t \geq 1$ , a global action  $a_t \in \mathcal{A}$  is selected by the learner, and she observes:

$$r_{t,e,a_e} = \tilde{\theta}_e(a_e), \forall e \in [\rho] : \phi_e(a_{t,e}) = 1.$$

In other words, in the semi-bandit feedback setting, a (global) action  $a \in \mathcal{A}$  is selected and the learner observes a vector of rewards  $[r_e(a_e)]_{e \in [\rho], a_e \subseteq a}$ , where  $r_e(a_e) = \theta_e(a_e)^\top \phi_e(a_e) + \eta_e$ , where  $\eta_e \sim \mathcal{N}(0, 1)$  is i.i.d. Gaussian Noise. Note that the feature vectors satisfy  $\|\phi(a)\|_0 = \rho, \forall a \in \mathcal{A}$  and  $\|\phi_e(a_e)\|_0 = 1, \forall e \in [\rho], a_e \in \mathcal{A}_e$ . In order to further clarify the connection to the semi-bandit feedback, we provide a concrete example below.

*Example 1.* Consider the line factor graph in Fig. 7 with  $N = 3$  agents,  $\rho = 2$  groups, and  $K = 2$  actions. The reward can be written as  $r(a_1, a_2, a_3) = r_1(a_1, a_2) + r_2(a_2, a_3)$ . Let  $a_i \in \{0, 1\}$ , for all  $i \in [N]$ . The average reward can be expressed by the vector  $\tilde{\theta} = ((\theta_1(a_1, a_2))_{(a_1, a_2) \in \{0, 1\}^2}, (\theta_2(a_2, a_3))_{(a_2, a_3) \in \{0, 1\}^2}) \in \mathbb{R}^8$ , where

$$\begin{aligned} (\theta_1(a_1, a_2))_{(a_1, a_2) \in \{0, 1\}^2} &= (\theta_1(0, 0), \theta_1(0, 1), \theta_1(1, 0), \theta_1(1, 1)) \\ (\theta_2(a_2, a_3))_{(a_2, a_3) \in \{0, 1\}^2} &= (\theta_2(0, 0), \theta_2(0, 1), \theta_2(1, 0), \theta_2(1, 1)). \end{aligned}$$

For example, selecting action  $a = (0, 0, 0)$ , corresponds to the feature vector  $\phi(a) = (1, 0, 0, 0, 1, 0, 0, 0)$ , while selecting action  $b = (0, 1, 0)$  corresponds to the feature vector  $\phi(b) = (0, 1, 0, 0, 0, 0, 1, 0)$ .

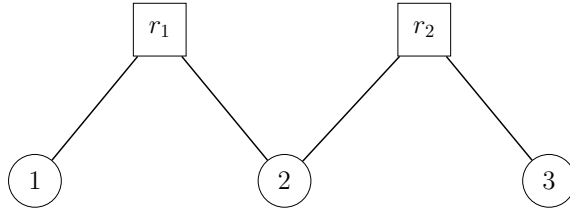

Figure 7: Factor graph from Example 1.

## F Constraint reduction

### F.1 Proof of Lemma 5.4

*Proof.* First, we shall prove  $C_\theta^\circ(m+1) \leq C_\theta^\circ(m)$ ,  $\forall m \in [K^N - 1]$ , by induction. The base case, for  $m = 1$ , is  $C_\theta^\circ(2) \leq C_\theta^\circ(1)$ . Note that  $C_\theta^\circ(1)$  can be written as

$$\inf_{\tilde{v} \in \tilde{\mathcal{V}}_\circ} \sum_{e \in [\rho], a_e \in \mathcal{A}_e} \tilde{v}_{a_e} (\theta_e(a_e^*) - \theta_e(a_e)) \quad (24)$$

$$\text{s.t.} \quad \sum_{e \in [\rho]: a_e^{(2)} \neq a_e^*} \tilde{v}_{a_e^{(2)}}^{-1} \leq \Delta_1^2 \quad (25)$$

$$\sum_{e \in [\rho]: a_e \neq a_e^*} \tilde{v}_{e, a_e}^{-1} \leq \Delta_1^2, \forall a \in \mathcal{A} \setminus \{a^{(1)}, a^{(2)}\}, \quad (26)$$

while  $C_\theta^\circ(2)$  is defined as

$$\inf_{\tilde{v} \in \tilde{\mathcal{V}}_\circ} \sum_{e \in [\rho], a_e \in \mathcal{A}_e} \tilde{v}_{a_e} (\theta_e(a_e^*) - \theta_e(a_e)) \quad (27)$$

$$\text{s.t.} \quad \sum_{e \in [\rho]: a_e^{(2)} \neq a_e^*} \tilde{v}_{a_e^{(2)}}^{-1} \leq \Delta_1^2 \quad (28)$$

$$\sum_{e \in [\rho]: a_e^{(3)} \neq a_e^*} \tilde{v}_{a_e^{(3)}}^{-1} \leq \Delta_2^2 \quad (29)$$

$$\sum_{e \in [\rho]: a_e \neq a_e^*} \tilde{v}_{e, a_e}^{-1} \leq \Delta_2^2, \forall a \in \mathcal{A} \setminus \{a^{(1)}, a^{(2)}, a^{(3)}\}. \quad (30)$$

Now, the constraints (25) and (28) are identical. The constraints (29)-(30) can be simply written as

$$\sum_{e \in [\rho]: a_e \neq a_e^*} \tilde{v}_{e, a_e}^{-1} \leq \Delta_2^2, \forall a \in \mathcal{A} \setminus \{a^{(1)}, a^{(2)}\}.$$

The expression is identical to (26) with the exception of the term  $\frac{1}{\Delta_1^2}$  in place of  $\frac{1}{\Delta_2^2}$ . As  $\Delta_1 \leq \Delta_2$ , we naturally conclude that  $C_\theta^\circ(2) \leq C_\theta^\circ(1)$ .

Now, assume that  $C_\theta^\circ(m'+1) \leq C_\theta^\circ(m')$  holds for  $m' = m - 1$ , to complete the induction we need to show that  $C_\theta^\circ(m'+1) \leq C_\theta^\circ(m')$ , for  $m' = m$ . By following a similar approach to the base case, we can show that the only difference in the optimization problems defining  $C_\theta^\circ(m')$  and  $C_\theta^\circ(m'+1)$  is in the last set of constraints: for  $C_\theta^\circ(m')$  these constraints are

$$\sum_{e \in [\rho]: a_e \neq a_e^*} \tilde{v}_{e, a_e}^{-1} \leq \Delta_{m'}^2, \forall a \in \mathcal{A} \setminus \cup_{j \in [m']} \{a^{(j+1)}\},$$

while for  $C_\theta^\circ(m'+1)$  they can be written as

$$\sum_{e \in [\rho]: a_e \neq a_e^*} \tilde{v}_{e, a_e}^{-1} \leq \Delta_{m'+1}^2, \forall a \in \mathcal{A} \setminus \cup_{j \in [m']} \{a^{(j+1)}\}.$$

Hence, we can directly conclude that  $C_\theta^\circ(m'+1) \leq C_\theta^\circ(m')$ , as it holds that  $\Delta_{m'} \leq \Delta_{m'+1}$

Now, to complete the proof, we show that  $C_\theta^* \leq C_\theta^{\text{MF}}(m)$ ,  $\forall m \in [K^N - 1]$ . Since we have that  $C_\theta^{\text{MF}}(m+1) \leq C_\theta^{\text{MF}}(m)$ , it is sufficient to prove that  $C_\theta^* \leq C_\theta^{\text{MF}}(K^N - 1)$ . It is easy to check that  $C_\theta^{\text{MF}}(K^N - 1)$  can be written as

$$\inf_{\tilde{v} \in \tilde{\mathcal{V}}_{\text{MF}}} \sum_{e \in [\rho], a_e \in \mathcal{A}_e} \tilde{v}_{a_e} (\theta_e(a_e^*) - \theta_e(a_e)) \quad \text{s.t.} \quad \sum_{e \in [\rho]: a_e \neq a_e^*} \tilde{v}_{a_e}^{-1} \leq \Delta(a)^2, \forall a \neq a^*. \quad (31)$$

Eq. (31) corresponds to  $C_\theta^*$  in (1), with the difference that the variables are in  $\tilde{\mathcal{V}}_{\text{MF}}$ . As  $\tilde{\mathcal{V}}_{\text{MF}} \subseteq \tilde{\mathcal{V}}$  we conclude that  $C_\theta^* \leq C_\theta^{\text{MF}}(K^N - 1)$ .  $\square$

## G Variable Elimination and Factored Constraint Reduction

First, we present VE (Alg. 2) and FCR (Alg. 3), two important sub-routines used in this paper. We use VE to select the best global action in the exploitation phase of ESM (Sec. 6), and FCR to represent in a compact way the exponentially large constraint set of the lower bound problems 8. We then report known results on the complexity and correctness of these algorithms. To clarify their use, we present examples of the application of these methods on specific factor graphs to compute the global best arm. We finally present algorithms to efficiently compute the  $m$ -best global actions used in the constraint reduction  $C_\theta^\circ(m)$

### G.1 Variable Elimination

The VE algorithm [14] is a classical algorithm for probabilistic graphical models used for a variety of exact inference tasks (e.g., maximum a posteriori, computation of marginals, etc. [27]). It involves iteratively eliminating variables by combining and marginalizing factors to find the most probable assignment until only the query variables remain. Specifically, VE takes as input an elimination order  $\mathcal{O}$ , where  $\mathcal{O}(i)$  is the  $i^{\text{th}}$  variable to be eliminated and a set of factored functions  $\mathcal{R} = \{r_e\}_{e \in [\rho]}$ . Each factor  $r_e$  is a function mapping  $a_e \in \mathcal{A}_e$  to real values. For a factor  $r_e$ , we denote its scope by  $\text{SC}(r_e) \subseteq [N]$ , which represents the set of variables involved in the factor.

The algorithm proceeds iteratively for  $i = 1, \dots, N$ , by eliminating variable  $l = \mathcal{O}(i)$  in each round. In round  $i$ , all the factors  $r_e$  containing variable  $l$  in their scopes are collected in the set  $\mathcal{R}_l$ . Subsequently, the (marginal) best response for agent  $l$  is computed as  $p_l(a_{e \setminus l}) = \max_{a_l \in \mathcal{A}_l} \sum_{r_e \in \mathcal{R}_l} r_e(a_{e \setminus l}, a_l)$ , where  $a_{e \setminus l}$  corresponds to the action  $a_e$  with the component corresponding to the  $l$ -th agent is removed. The set of factors is then updated as  $\mathcal{R} \leftarrow \mathcal{R} \cup \{p_l(a_{e \setminus l})\} \setminus \mathcal{R}_l$ . At this point, every factor containing  $l$  in its scope is eliminated. At the next iteration, the algorithm selects the next variable to be eliminated and repeats this procedure until  $i = N$ . Finally, it returns the optimal value  $\sum_{p \in \mathcal{R}} p_{\mathcal{O}(N)}$ .

---

#### Algorithm 2 VE

---

**Input:** Elimination order  $\mathcal{O}$ , factors  $\mathcal{R}$   
**for**  $i = 1, \dots, N$  **do**  
     $l = \mathcal{O}(i)$   
     $\mathcal{R}_l = \{r_e \in \mathcal{R} : l \in \text{SC}(r_e)\}$   
     $p_l(a_{e \setminus l}) = \max_{a_l \in \mathcal{A}_l} \sum_{r_e \in \mathcal{R}_l} r_e(a_l, a_{e \setminus l})$   
     $\mathcal{R} \leftarrow \mathcal{R} \cup \{p_l(a_{e \setminus l})\} \setminus \mathcal{R}_l$   
**return**  $\sum_{p \in \mathcal{R}} p_{\mathcal{O}(N)}$

---

**Complexity of VE.** VE is guaranteed to return the optimal global arm in  $O(NK^{A_{\mathcal{O}}+1})$  operations [27], where  $A_{\mathcal{O}} = \max_{i \in [N]} |\text{SC}(p_{\mathcal{O}(i)})|$  is the size of the largest factor generated when using elimination order  $\mathcal{O}$ . The complexity of VE depends on the elimination order  $\mathcal{O}$  and is linear in the maximum size of the scope of "best-response functions" introduced in the elimination process. App. G.4 discuss the scaling of elimination orders for typical factor graphs.

**Example of VE application.** We now illustrate the use of VE to compute a global optimal arm  $a_\theta^*$  in the following example. Note that VE, applied to  $\mathcal{R} = \{\theta_e\}_{e \in [\rho]}$  returns the highest global expected reward  $\theta(a^*)$ . A backward pass of the VE algorithm recovers the optimal arm  $a^*$  as shown in the following example.

*Example 2.* Consider the factor graph in Fig. 8 with  $N = \rho = 4$ . The average reward is described as:

$$\theta(a) = \theta_1(a_1, a_2) + \theta_2(a_2, a_4) + \theta_3(a_1, a_3) + \theta_4(a_3, a_4).$$

The key idea in VE is that, rather than summing all reward functions and then doing the maximization, we fix an ordering for the variables, and we maximize over variables one at a time, according to the elimination order  $\mathcal{O}$ . For example, let  $\mathcal{O} = \{a_4, a_3, a_2, a_1\}$ . Starting from  $a_4$ , we get

$$\max_{a \in \mathcal{A}} \theta(a) = \max_{a_1, a_2, a_3} \theta_1(a_1, a_2) + \theta_3(a_1, a_3) + \max_{a_4} \theta_2(a_2, a_4) + \theta_4(a_3, a_4).$$

Agent 4 can summarize its marginal best response when varying  $(a_2, a_3)$  using a new factor  $p_4(a_2, a_3) = \max_{a_4} \theta_2(a_2, a_4) + \theta_4(a_3, a_4)$ , which represents the best response of agent 4 condi-



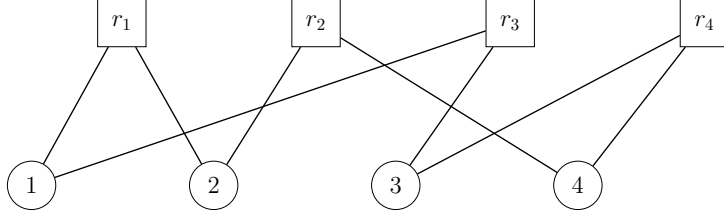

Figure 8: Factor graph from example 2.

tioned on the actions played by agents 2, 3. We may also denote  $a_4^*(a_2, a_3) = \arg \max_{a_4} \theta_2(a_2, a_4) + \theta_4(a_3, a_4)$  as the best action for agent 4 conditioned on the actions of agent 2, 3. Hence, we get

$$\max_{a \in \mathcal{A}} \theta(a) = \max_{a_1, a_2, a_3} \theta_1(a_1, a_2) + \theta_3(a_1, a_3) + p_4(a_2, a_3).$$

Similarly, agent 3, performs its marginal best response  $p_3(a_1, a_2) = \max_{a_3} \theta_3(a_1, a_3) + p_4(a_2, a_3)$ , and marginal best action  $a_3^*(a_1, a_2) = \arg \max_{a_3} \theta_3(a_1, a_3) + p_4(a_2, a_3)$ . The problem is further reduced to

$$\max_{a \in \mathcal{A}} \theta(a) = \max_{a_1, a_2} \theta_1(a_1, a_2) + p_3(a_1, a_2).$$

Next, agent 2 computes her marginal best response  $p_2(a_1) = \max_{a_2} \theta_1(a_1, a_2) + p_3(a_1, a_2)$ , and marginal best action  $a_2^*(a_1) = \arg \max_{a_2} \theta_1(a_1, a_2) + p_3(a_1, a_2)$ .

Finally, agent 1 selects compute the best response  $p_1 = \max_{a_1} p_2(a_1)$ , and we have

$$\max_{a \in \mathcal{A}} \theta(a) = \max_{a_1} p_2(a_1).$$

We can recover the best global action  $a^* = (a_1^*, a_2^*, a_3^*, a_4^*)$  by performing the entire process in reverse order:  $a_1^* = \arg \max_{a_1} p_2(a_1)$ ,  $a_2^* = \arg \max_{a_2} \theta_1(a_1^*, a_2) + p_3(a_1^*, a_2)$ ,  $a_3^* = \arg \max_{a_3} \theta_3(a_1^*, a_3) + p_4(a_2^*, a_3)$ , and  $a_4^* = \arg \max_{a_4} \theta_2(a_2^*, a_4) + \theta_4(a_3^*, a_4)$ .

Note that the complexity of VE for this example is  $O(K^3)$  floating point operations, while naively finding the best global action would require  $O(K^4)$  operations.

## G.2 Factored Constraint Reduction

The FCR algorithm follows a similar idea to VE to represent a set of factorized constraints in a compact manner and is inspired by the Factored-LP algorithm [20] to reduce constraints in the Bellman LP for Factored MDPs. FCR considers constraints of the type:

$$\mathcal{C} = \left\{ \sum_{e \in [\rho]} p_e(a_e) \leq c, \forall a \in \mathcal{A} \right\},$$

where  $p_e(\cdot)$  is a factor function mapping local actions  $a_e \in \mathcal{A}_e$  to real values, and  $c$  is a constant, and construct an equivalent set of constraints  $\mathcal{K}$  of reduced size. We present the pseudo-code of FCR in Alg. 3 and describe its steps below.

FCR takes as input an initial set of factors  $\mathcal{F} = \{p_e, \forall e \in [\rho]\}$ , and an ordered elimination set  $\mathcal{O}$ . For a factor  $p \in \mathcal{F}$ , we define its *scope*  $\text{SC}(p) \subseteq [N]$  as the set of agents involved in  $p$ . We also associate a real variable to each factor  $p \in \mathcal{F}$ ,  $u_{\text{SC}(p)}^p$ . After initializing the output constraint set as  $\mathcal{K} = \emptyset$ , the algorithm proceeds in an iterative manner. At each iteration  $i = 1, \dots, N$ , we set  $l = \mathcal{O}(i)$  (the  $i^{\text{th}}$  element of  $\mathcal{O}$ ), and define  $\mathcal{F}_l = \{p \in \mathcal{F} : l \in \text{SC}(p)\}$ . We then introduce a new factor  $p_l$  having scope  $\text{SC}(p_l) = \cup_{p \in \mathcal{F}_l} \{\text{SC}(p)\} \setminus \{l\}$ , and we associate the variable  $u_{\text{SC}(p_l)}^{p_l}$  to  $p_l$ . We include in  $\mathcal{K}$  a new set of constraints

$$u_{\text{SC}(p_l)}^{p_l} \geq \sum_{p \in \mathcal{F}_l} u_{\text{SC}(p)}^p, \quad \forall a_{\text{SC}(p_l)}, a_l.$$

We further include the new factor variable  $p_l$  in the set of factors  $\mathcal{F}$  and remove all factors in  $\mathcal{F}_l$  from it, i.e.,  $\mathcal{F} = \mathcal{F} \cup \{p_l\} \setminus \mathcal{F}_l$ . At  $l = \mathcal{O}(N)$ , we introduce the constraint  $u^{p_{\mathcal{O}(N)}} \leq c$  into  $\mathcal{K}$ , where  $p_{\mathcal{O}(N)}$  is the last generated factor and has empty scope.

---

**Algorithm 3** FCR
 

---

**Input:** Elimination order  $\mathcal{O}$ , factors  $\mathcal{F}$   
**Initialize**  $\mathcal{K} = \emptyset$   
**for**  $i = 1, \dots, N$  **do**  
    $l \leftarrow \mathcal{O}(i)$   
    $\mathcal{F}_l \leftarrow \{p \in \mathcal{F} : l \in \text{SC}(p)\}$   
    $\mathcal{K} \leftarrow \mathcal{K} \cup \left\{ u_{a_{\text{SC}(p_l)}}^{p_l} \geq \sum_{p \in \mathcal{F}_l} u_{a_{\text{SC}(p)}}^p, \forall a_{\text{SC}(p_l)}, a_l \right\}$   
    $\mathcal{F} \leftarrow \mathcal{F} \cup \{p_l\} \setminus \mathcal{F}_l$   
 $\mathcal{K} \leftarrow \mathcal{K} \cup \{u^{p_{\mathcal{O}(N)}} \leq c\}$   
**return**  $\mathcal{K}$

---

**Complexity of FCR.** The properties of FCR are directly inherited by the ones of VE. First, FCR is guaranteed to return a provably equivalent representation of the set of constraints [19, Thm. 4.4]. Specifically, let  $\mathcal{K} = \text{FCR}(\mathcal{C})$ . Then  $\mathcal{C}$  and  $\mathcal{K}$  are equivalent, that is, an assignment of variables  $(u, \tilde{v})$  is feasible for  $\mathcal{K}$  if and only if  $\tilde{v}$  is feasible for  $\mathcal{C}$ . Furthermore, similarly to VE, the number of constraints and variables to represent  $\mathcal{C}$  scales linearly in  $N$  and exponentially in  $A_{\mathcal{O}} = \max_{i \in [N]} |\text{SC}(p_{\mathcal{O}(i)})|$ , i.e., the size of the largest scope when using the elimination order  $\mathcal{O}$ . Specifically, the number of constraints in  $\mathcal{K}$  scales as  $O(NK^{A_{\mathcal{O}}+1})$ . Note that FCR also includes  $O(NK^{A_{\mathcal{O}}})$  new (scalar) variables in the optimization problem. Note that the proof of Lemma 5.5 is a direct consequence of this result (see [19, Thm. 4.4] for details).

**Example of FCR application.** Let  $m \in [K^N - 1]$ . We provide an example of the application of FCR to reduce the combinatorial number of constraints appearing in (8)<sup>1</sup> :

$$\sum_{e \in [\rho] : a_e \neq a_e^*} \tilde{v}_{a_e}^{-1} \leq \Delta_m^2, \forall a \in \mathcal{A}.$$

*Example 3.* Consider the factor graph in Ex. 2. Let  $f_e(a_e) = \tilde{v}_{a_e}^{-1} \mathbb{1}_{\{a_e \neq a_e^*\}}$ , for all  $e \in [\rho]$ ,  $a_e \in \mathcal{A}_e$ . Then the set of constraints can be written as

$$\sum_{e \in [\rho]} f_e(a_e) \leq \Delta_m^2, \forall a \in \mathcal{A},$$

or equivalently as

$$\Delta_m^2 \geq \max_{a_1, a_2, a_3, a_4} f_1(a_1, a_2) + f_2(a_2, a_4) + f_3(a_1, a_3) + f_4(a_3, a_4).$$

We introduce a set of variables  $(u_{a_e}^{f_e})_{e \in [\rho], a_e \in \mathcal{A}_e}$ , and the equality constraints:

$$u_{a_e}^{f_e} = \tilde{v}_{a_e}^{-1}, \forall e \in [\rho], a_e \in \mathcal{A}_e.$$

Note that we can rewrite  $f_e(a_e) = u_{a_e}^{f_e}$ . Then, we fix an elimination ordering  $\mathcal{O} = \{4, 3, 2, 1\}$  and initialize  $\mathcal{F} = \emptyset$ ,  $\mathcal{K} = \emptyset$ . Now we introduce a new "function"  $p_l$  into  $\mathcal{F}$  by eliminating a variable  $l = \mathcal{O}(i)$ , at each round  $i = 1, \dots, 4$ .

For  $i = 1$ , we have  $\mathcal{O}(1) = 4$  and  $\mathcal{F}_1 = \{f_2(a_2, a_4), f_4(a_3, a_4)\}$ . We define a new variable  $u_{a_2, a_3}^{p_4}$  associated to  $p_4$ , and introduce the set of constraints:

$$u_{a_2, a_3}^{p_4} \geq u_{a_4, a_2}^{f_2} + u_{a_4, a_3}^{f_4}, \forall (a_2, a_3, a_4) \in \mathcal{A}_2 \times \mathcal{A}_3 \times \mathcal{A}_4.$$

These in constraints are included in the set  $\mathcal{K}$ . We further exclude the function  $f_2$  and  $f_4$  from the set  $\mathcal{F}$ , while including  $p_4$  in it.

Subsequently, we consider  $i = 2$  and  $\mathcal{O}(2) = 3$ . Then  $\mathcal{F}_3 = \{p_4(a_2, a_3), f_3(a_3, a_1)\}$ . We introduce the new set of constraints:

$$u_{a_1, a_2}^{p_3} \geq u_{a_2, a_3}^{p_4} + u_{a_3, a_1}^{f_3}, \forall (a_1, a_2, a_3) \in \mathcal{A}_1 \times \mathcal{A}_2 \times \mathcal{A}_3,$$

---

<sup>1</sup>Note that the original constraints (8) are defined for actions  $a \in \mathcal{A} \setminus \cup_{j \in [m]} \{a^{(j+1)}\}$ . However the redundant constraints  $a \in \cup_{j \in [m]} \{a^{(j+1)}\}$  are inactive since the constraints  $\sum_{e \in [\rho] : a_e^{(j+1)} \neq a_e^*} \tilde{v}_{e, a_e^{(j+1)}}^{-1} \leq \Delta_j^2, \forall j \in [m]$  appearing in the problem defining  $C_{\circ}^{\circ}$  are tighter. Hence these constraints may be included w.l.o.g.

and we add them to the constraint set  $\mathcal{K}$ . We proceed to eliminate  $p_4$  and  $f_3$  from  $\mathcal{F}$  and include  $p_3$ . We then move to  $i = 3$ ,  $\mathcal{O}(3) = 2$  and define  $\mathcal{F}_2 = \{f_1(a_1, a_2), p_3(a_1, a_2)\}$ . The set of constraints introduced at this step are:

$$u_{a_1}^{p_2} \geq u_{a_1, a_2}^{p_3} + u_{a_1, a_2}^{f_1}, \forall (a_1, a_2) \in \mathcal{A}_1 \times \mathcal{A}_2,$$

and similarly to the previous steps we add these constraints to  $\mathcal{K}$  and eliminate the variables  $p_3$  and  $f_1$  from  $\mathcal{F}$ , while including  $p_2$ . The last step at  $\mathcal{O}(4) = 1$  consists of including in  $\mathcal{K}$  the constraints

$$u^{p_1} \geq u_{a_1}^{p_2}, \forall a_1 \in \mathcal{A}_1.$$

Finally we add to  $\mathcal{K}$  the constraint  $u^{p_1} \leq \Delta_m^2$ , and output  $\mathcal{K}$ . The number of constraints in the transformed set is  $|\mathcal{K}| = 2K^3 + K^2 + K + 1$ , while the original set has  $|\mathcal{C}| = K^4 - 1$  constraints.

### G.3 $m$ -BEST algorithm

In this section, we discuss an algorithm to find the  $m$ -best global arms. As explained in App. F, a set of tighter approximations  $C_\theta^\circ(m)$ , for  $m \in [K^N - 1]$ , can be built by considering an ordering of the first  $m$  smallest gaps and hence requires to compute the  $m + 1$  global arms with highest expected rewards. The Lawler and Nilsson's  $m$ -BEST algorithm [26, 30], briefly described in the remainder of this section, will serve this purpose.

The procedure was originally devised to compute the  $m$  most probable configurations in graphical models. The main idea is the following: At each step, the  $m$ -BEST find the best solution to a re-formulation of the original problem that excludes the solutions already discovered. Specifically, at each time iteration  $j < m$ , the algorithm runs VE excluding the first  $j$  most probable configurations. The Lawler's algorithm [26] starts by computing the best global action  $a^{(1)}$  by applying VE (with elimination order  $\mathcal{O}$ ) over the combinatorial action space  $\mathcal{A}$  by applying VE  $N$  times. To determine the second best action  $a^{(2)}$ , the algorithm searches over the set  $\mathcal{A}_{(2)} = \mathcal{A} \setminus \{a^{(1)}\}$ . More generally, at iteration  $j$ , the algorithm finds the  $j^{\text{th}}$  best global action  $a^{(j)}$  by running VE over the sets  $\mathcal{A}_{(j)} = \mathcal{A} \setminus \cup_{k \in [j]} \{a^{(k)}\}$ . This procedure provably identifies the  $m$ -best global actions with complexity  $O(mN^2 K^{A_{\mathcal{O}}+1})$ . By leveraging similar ideas and using a junction tree representation of the graph, Nilsson [30] improves over this procedure leading to an  $m$ -best algorithm with complexity  $O(mNK^{A_{\mathcal{O}}+1})$ .

### G.4 Examples of optimal elimination orders

The following lemma presents a few examples of optimal elimination orderings, i.e. orderings  $\mathcal{O}$  that minimize  $A_{\mathcal{O}}$ , for specific factor graph topologies.

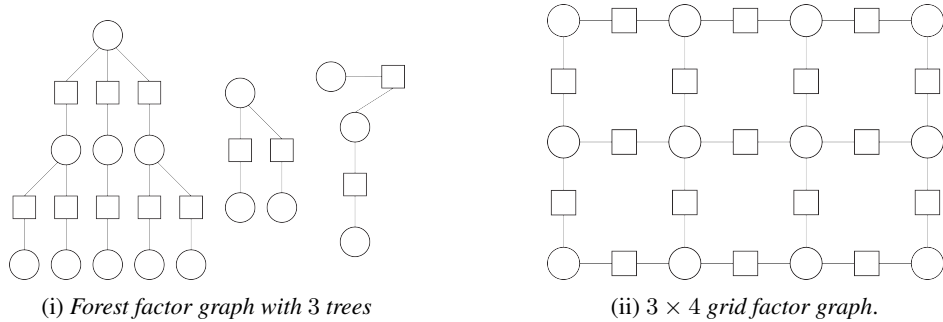

Figure 9: Examples of factor graphs.

**Lemma G.1.** *There exist known optimal orderings for the following factor graph structures. These orderings yield*

1.  $A_{\mathcal{O}} = 2$  for any forest factor graph,
2.  $A_{\mathcal{O}} = 1 + \min\{p, q\}$  for any  $p \times q$  grid factor graph.

The lemma implies that there are optimal orderings for a *tree* (Fig. 9), *star*, and *line* (Fig. 3) factor graphs with  $A_{\mathcal{O}} = 2$  (since are particular cases of forests), and for ring factor graphs 3 have  $A_{\mathcal{O}} = 3$ . It is easy to verify that the optimal elimination order for trees starts eliminating factors from the "leaves" of each tree composing the forest and proceeds upwards to the roots, while for grids the optimal ordering starts from any "corner" of the grid and proceeds inwards [39].

However, note that finding an optimal ordering for general graphs, is an  $\mathcal{NP}$ -hard problem [14], and the worst-case runtime of VE is exponential in  $N$ . This issue has been mitigated successfully for a large variety of graph structures in the graphical model community, where there exist a variety of heuristics for the VE ordering problem (see [27, Sec. 4.3.3] for a comprehensive overview of these methods).

## H Complexity results

We state a set of fundamental complexity results for various problems encountered in this paper.

**Lemma H.1.**  $\exists \theta \in \mathcal{M}$  for which the following problems are  $\mathcal{NP}$ -hard:

- (P1): Determining the best global action:  $a_{\theta}^* = \arg \max_{a \in \mathcal{A}} \sum_{e \in [\rho]} \theta_e(a_e)$ .
- (P2): Determining the  $m$ -best global actions, for  $m \in [K^N]$ .
- (P3): Given  $\tilde{v} \in \mathbb{R}^{\tilde{A}}$ , decide if  $\tilde{v} \in \tilde{\mathcal{V}}$ .

*Proof.* (P1) can be reduced to the task of finding a Maximum A Posteriori (MAP) assignment in probabilistic graphical models, which is known to be  $\mathcal{NP}$ -hard [27, pag. 142]. Specifically, if  $\theta \in \mathcal{V}$ , i.e., it is an element of the  $A - 1$  dimensional simplex, then (P1) corresponds to finding the MAP assignment for the measure  $\theta$ . If  $\theta \notin \mathcal{W}$ , we can find a mapping  $f : \mathbb{R}^A \rightarrow \mathcal{V}$  s.t.  $\theta' = f(\theta)$  and  $a_{\theta}^* = a_{\theta'}^*$ . Alternatively, (P1) can be cast as a Distributed Constraint Optimization Problem (DCOP), which is known to be  $\mathcal{NP}$ -hard [29]. Clearly, (P2) is  $\mathcal{NP}$ -hard since it can be reduced to (P1) for  $m = 1$ . Problem (P3) was shown to be  $\mathcal{NP}$ -complete by [34].  $\square$

## I An algorithm for selecting $\mathcal{A}_0$

We present in Alg. 4, the pseudocode of a simple procedure for selecting  $\mathcal{A}_0$ . It takes as input the set of global actions  $\mathcal{A}$  and the set of group actions  $\mathcal{A}_e$  for all  $e \in [\rho]$ . Let  $I_{e,a_e} = \sum_{b \in \mathcal{A}_0} \mathbb{1}_{\{a_e = b_e\}}$  be the counter of group actions  $a_e \in \mathcal{A}_e$  in  $\mathcal{A}_0$ , and define  $I_e = (I_{e,a_e})_{a_e \in \mathcal{A}_e} \in \mathbb{N}^{\mathcal{A}_e}$ .

To describe the algorithm, we assume w.l.o.g. that  $\mathcal{A}$  is an ordered set, and denote by  $\mathcal{A}(i)$  the  $i^{\text{th}}$  global action. First, the algorithm initializes  $\mathcal{A}_0 \leftarrow \emptyset$ , and  $I_e = 0 \in \mathbb{N}^{\mathcal{A}_e}, \forall e \in [\rho]$ . Then, the algorithm iterates over groups  $e \in [\rho]$  and groups' actions  $b_e \in \mathcal{A}_e$ , and iteratively includes arms in  $\mathcal{A}$  into the set  $\mathcal{A}_0$  which are never observed in previous iterates. By construction, Alg. 4, ensures that  $\mathcal{A}_0$  contains global action covering every group action.

---

### Algorithm 4 BUILD $\mathcal{A}_0$

---

**Input:** Global actions  $\mathcal{A}$ , group actions  $(\mathcal{A}_e)_{e \in [\rho]}$   
**Initialize:**  $\mathcal{A}_0 \leftarrow \emptyset, I_e = 0 \in \mathbb{N}^{\mathcal{A}_e}, \forall e \in [\rho]$ ,  
**for**  $e \in [\rho]$  **do**  
     $i \leftarrow 1$   
    **while**  $\min_{a_e \in \mathcal{A}_e} I_{e,a_e} = 0$  **do**  
         $a \leftarrow \mathcal{A}(i)$   
        **for**  $b_e \in \mathcal{A}_e$  **do**  
            **if**  $b_e = a_e$  and  $I_{e,b_e} = 0$  **then**  
                 $\mathcal{A}_0 \leftarrow \mathcal{A}_0 \cup \{a\}$   
                 $I_{e,b_e} \leftarrow I_{e,b_e} + 1$   
         $i \leftarrow i + 1$   
**Return**  $\mathcal{A}_0$

---

Alg. 4 returns an exploration set that covers all group actions and that satisfies  $|\tilde{\mathcal{A}}_0| \leq \tilde{A}$ . Note that Alg. 4 may be easily improved with more precise search strategies, at the cost of increased computational complexity. For example, the algorithm could include in  $\mathcal{A}_0$ , at each step, global arms  $a \in \mathcal{A}$  which maximizes the number of non-observed group actions corresponding to the global actions in  $\mathcal{A}_0$ . When the set  $\mathcal{A}$  is large, these refined searches may be computationally expensive.

*Example 4* ( $\mathcal{A}_0$  action choice). Consider the example in Fig. 8 with  $K = 2$  local actions and  $N = 4$  agents (i.e.,  $A = 16$  actions). In such setting, we can select  $\mathcal{A}_0 = \{a_{0000}, a_{0110}, a_{1001}, a_{1111}\}$ . Running Alg. 4 on this instance instead produces the set  $\mathcal{A}_0 = \{a_{0000}, a_{0001}, a_{0110}, a_{0111}, a_{1000}, a_{1010}, a_{1100}\}$ .

## J MAMABs with specific graph structures

In this section, we present different MAMABs with specific graph structures.

### J.1 Acyclic factor graphs

In this section, we introduce a few definitions and preliminary concepts on graphs from [39], and report examples of acyclic factor graphs. A *hypergraph*  $G = (V, E)$  is a tuple containing: a vertex set  $V = [N]$ , and a set  $E$  of hyperedges, where each hyperedge  $e \in E$  is a particular subset of  $V$ . The *factor graph* associated to an *hypergraph* is a bipartite graph  $G' = (V', E')$  with vertex set  $V' = V \cup E$  and an edge set  $E'$  that includes elements  $(i, e)$ , where  $i \in V$  and  $e \in E$ , if and only if the hyperedge  $e$  include vertex  $i$ . A *join tree* associated to a factor graph  $G$ , a.k.a. *junction tree*, is a tree  $T = (V'', E'')$  such that the vertex set  $V''$  corresponds to the factors of  $G'$ , and if two factors  $e, e'$  include in their scope the same variable  $i$  in  $G'$ , then every factor on the unique path between  $e$  and  $e'$  also include  $i$  in  $T$ .

**Definition J.1** (Acyclic factor graph). A factor graph is said to be acyclic if it has a join tree.

Examples of acyclic factor graphs include the star and line factor graphs presented in Fig. 3, trees, and forest (i.e., ensembles of trees) depicted in Fig. 9.

### J.2 Networked Bandits

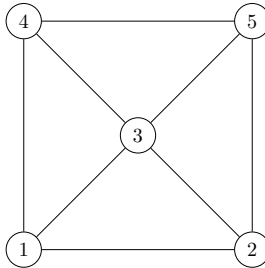

Figure 10: Example of reward graph in networked bandits.

We discuss a relevant particular case of MAMABs which we name Networked Bandits (NBs). NBs consist of a set of  $N$  agents that are associated to an undirected graph  $\mathcal{G} = (\mathcal{N}, \mathcal{E})$ , where  $\mathcal{N} = \{1, \dots, N\}$  and  $\mathcal{E} \subset \mathcal{N} \times \mathcal{N}$  is the set of edges. Each agent  $i \in \mathcal{N}$ , is associated with a local action  $a_i \in \mathcal{A}_i$ . We also denote the global action as  $a = (a_1, \dots, a_N) \in \mathcal{A}_1 \times \dots \times \mathcal{A}_n$ . For a node  $i \in \mathcal{N}$ , denote its neighbors by  $\mathcal{N}_i$ , and let  $\mathcal{N}_{+i} = \mathcal{N}_i \cup \{i\}$ . In our model, each agent is associated with a local reward function  $r_i(a_{\mathcal{N}_{+i}})$  depending on the local action and on the actions of neighbors  $a_{\mathcal{N}_{+i}}$ . The reward experienced by node  $i \in [N]$  is expressed as

$$r_i(a_{\mathcal{N}_{+i}}) = \theta_i(a_i) + \sum_{j \in \mathcal{N}_i} \theta_{i,j}(a_i, a_j) + \eta_i, \quad (32)$$

where  $\eta_i \sim \mathcal{N}(0, 1)$ ,  $\theta_i(a_i)$  is the average reward for the distribution of the  $i$ -th agent when she pulls action  $a_i$ , and  $\theta_{i,j}(a_i, a_j)$  are the means of the distribution of the neighbor's terms influencing the reward by pulling action  $a_j$ . For a given set  $\mathcal{S} \subseteq [N]$ , we denote by  $a_{\mathcal{S}} = (a_s)_{s \in \mathcal{S}}$ . The NBs setting can be interpreted as a particular case of MAMABs in which  $\rho = N$ , and each group corresponds to a node and its neighbors.

### J.3 Reductions

The general MAMAB model studied in this paper encompasses the following particular cases:

- (i) *Plain bandit*: For  $\rho = 1$  and  $\mathcal{S}_1 = [N]$ , i.e.,  $N$  agents (each with  $K$  local actions) connected to a single factor, the model reduces to a plain bandit model [25] with an exponentially large action space, i.e.,  $|\mathcal{A}| = K^N$ .
- (ii) *Uncoordinated bandit*: For  $\rho = N$  and  $\mathcal{S}_e = \{e\}$ , for all  $e \in [\rho]$ , i.e., each group reward  $r_e$  only depends on the action of a single agent  $a_e \in \mathcal{A}_e : |\mathcal{A}_e| = K$ .

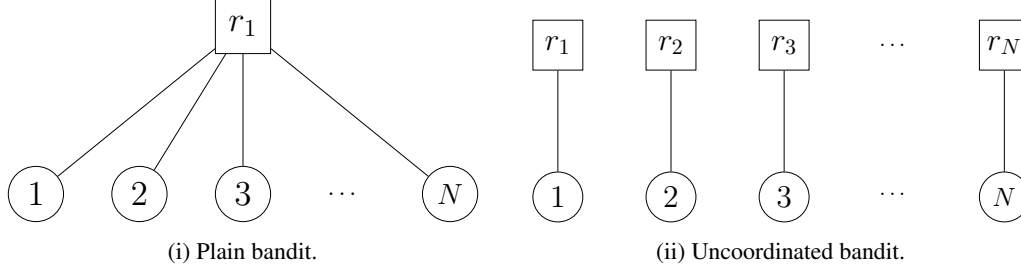

Figure 11: Factor graphs for specific MAMAB models.

For (i), the global reward can be simply written as  $\theta(a) = \theta_1(a_1, \dots, a_N)$ . Furthermore, the group variables and global variables coincide, i.e.,  $\tilde{\mathcal{V}} = \mathbb{R}_{\geq 0}^A$ . The lower bound constant for the MAMAB model matches the one in the plain bandit setting [25], i.e., we have

$$C_\theta^* = \inf_{v \in \mathbb{R}_{\geq 0}^A} \sum_{a \in \mathcal{A}} v_a \Delta(a) \quad \text{s.t.} \quad \frac{v_a^{-1}}{\Delta(a)^2} \leq 1, \forall a \in \mathcal{A}.$$

The uncoordinated setting (ii) corresponds to a game with  $N$  independent bandits, each having observed rewards  $\theta_i(a_i)$ . Note that, as  $\rho = N$ , we can use the indices  $e$  and  $i$  interchangeably (each group contains a unique agent). We can write the global reward simply as  $\theta(a) = \sum_{i \in [N]} \theta_i(a_i)$ , and each agent can determine its best arm independently, i.e., an action  $a \in \mathcal{A}$  is sub-optimal  $a \neq a^* \iff \exists i \in [N] : a_i \neq a_i^*$ . Then, the expression for the lower bound constant of (ii) can be written as  $C_\theta^* = \sum_{i \in [N]} C_{\theta_i}^*$ , where

$$C_{\theta_i}^* = \min_{w_{i,a_i} \in \mathbb{R}_{\geq 0}^K} \sum_{a_i \in \mathcal{A}_i} w_{i,a_i} (\theta_i(a_i^*) - \theta_i(a_i)) \quad \text{s.t.} \quad \frac{w_{i,a_i}^{-1}}{(\theta_i(a_i^*) - \theta_i(a_i))^2}, \forall a_i \neq a_i^*$$

Note that for  $N = 1$  both (i) and (ii) reduce to a standard plain bandit model with  $|\mathcal{A}| = K$ .

## K Experimental settings and additional experiments

### K.1 Tightness of locally-tree like approximation

In this section we present experiments which highlight the tightness of the locally-tree like approximation  $C_\theta^L$ . We generate  $N_{\text{sim}} = 100$  MAMABs instances, for a ring and a tree factor graph (see Fig. 3) with  $N = 5$ ,  $K \in \{3, 4\}$ , when varying the parameters  $\theta_e(a_e)$ , for all  $e \in [\rho]$ ,  $a_e \in \mathcal{A}_e$  uniformly at random in the interval  $[0, 10]$ , and comparing the lower bound and the locally tree-like approximation constants.

The results are presented in Fig. 12. As expected for the line factor graph the locally tree like approximation is tight, as this graph topology does not contain cycles. Note that, although the ring graph contains a cycle and hence  $C_\theta^* \leq C_\theta^L$ , the locally tree like approximation is very close to  $C_\theta^*$  for most of the generated instances.

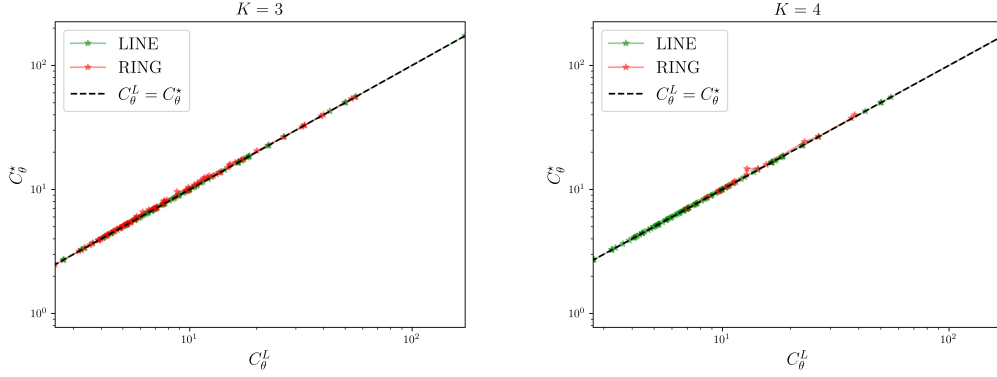

Figure 12: Comparison of  $C_\theta^*$  and  $C_\theta^L$ . Each point represent the lower bound constants for a MAMAB instance with a ring (green) or line (red) factor graph.

## K.2 Varying $m$ experiments

We report additional results on the regret of ESM for instances of MAMABs with a line and ring factor graphs with  $N = 5$ ,  $K = 3$ , and varying  $m$ . As for the other experiments, the group parameters  $\theta_e(a_e)$  are generated at random from the interval  $[0, 10]$ , for all  $e \in [\rho]$ ,  $a_e \in \mathcal{A}_e$  and results are averaged over  $N_{\text{sim}} = 5$  independent runs. The results are shown in Fig. 13. We use  $\diamond = \text{MF}$  for the ring graph and  $\diamond = \text{L}$  for the line graph.

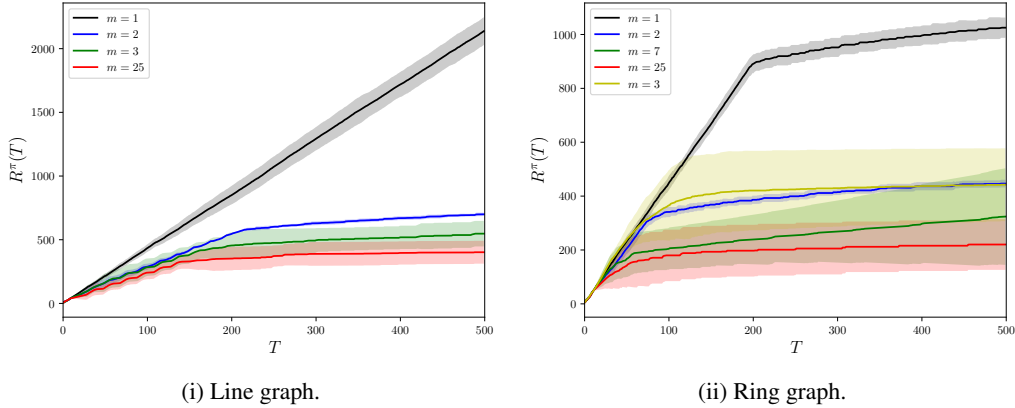

Figure 13: Experiments for varying  $m$ .

## K.3 Antenna tilt experiments simulation setting

The simulation settings used in the antenna tilt experiments are reported in Tab. 1.

Table 1: Simulator parameters.

| PARAMETER           | SYMBOL          | VALUE                            |
|---------------------|-----------------|----------------------------------|
| Number of sectors   | $ S $           | 6                                |
| Number of UEs       | $ \mathcal{U} $ | 1000                             |
| Antenna tilt values | $\mathcal{A}_i$ | $\{2^\circ, 7^\circ, 13^\circ\}$ |
| Carrier frequency   | $f$             | 1800 MHz                         |
| Antenna height      | $h$             | 32 m                             |
| Network size        | $M$             | 2 km <sup>2</sup>                |

#### K.4 Local approximation for cyclic factor graphs

In this section, we demonstrate experimentally that using  $\diamond = L$  for ESM in MAMABs with cyclic factor graphs not attain a better regret than targeting exploration driven by  $C_\theta^*$ , i.e. the true lower bound problem, even though  $C_\theta^* > C_\theta^L$  from the solutions of the lower bound optimization problems. We consider the cyclic factor graph in Fig. 14 (left) with  $K = 3$  local actions. We compare the performance of ESM for and  $\diamond = \{L, \star\}$ . In Fig. 14 (center), we show the lower bound as  $C_\theta^\diamond \log(T)$  and in Fig. 14 (right), we show the results for the regret of ESM when targeting  $C_\theta^*$  or  $C_\theta^L$ .

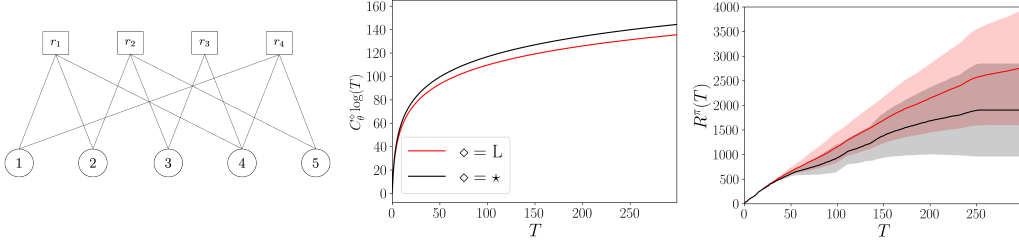

Figure 14: Left: cyclic factor graph considered for the experiments. Center: lower bound  $C_\theta^\diamond \log(T)$ , for  $\diamond = \{L, \star\}$ . Right: Performance of ESM for  $\diamond = \{L, \star\}$ .

In general, for many instances, we empirically observed that the values of  $C_\theta^* C_\theta^L$  are very close. For example, in Fig. 12 (App. K), we compare these two quantities for 100 randomly generated instances (of the group means) for a ring factor graph (see Fig. 3).

#### K.5 Quantifying the approximation ratio

In this section, we quantify the approximation ratio between the approximation constants  $C_\theta^\diamond(m)$  for  $\diamond = \{MF, L\}$ , when varying  $m$ , and the true lower bound constant  $C_\theta^*$ . We draw an instance of  $\theta$  for a ring, line, and star graph (see Fig. 3) by selecting group means  $\theta_e(a_e) \sim \mathcal{U}(0, M)$ , for all  $e \in [\rho], a_e \in \mathcal{A}_e$ .

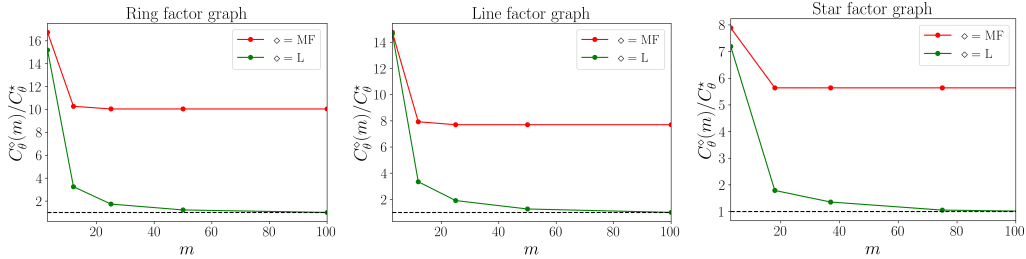

Figure 15: Approximation ratio  $C_\theta^\diamond(m)/C_\theta^*$  for  $\diamond = \{MF, L\}$  and for different graph topologies ( $K = 3, N = 5$ ). The dashed line represents  $C_\theta^\diamond(m)/C_\theta^* = 1$

The results presented in Fig. 15 show that  $C_\theta^{MF}(m)$  is close to  $C_\theta^*$  (they are equal up to a small constant) and decreases with  $m$ . For  $C_\theta^L(m)$ , the same hold, and for  $m$  large enough the approximation is tight, as predicted by our results.



## L Details on antenna tilt optimization experiments

In this section, we present details on the antenna tilt optimization experiments.

**Throughput.** The throughput  $T_{i,u}$ , is formally defined in terms of the Signal-to-Interference-plus-Noise Ratio (SINR), a metric that measures the quality of a signal in the presence of interference and noise. Let  $a_{\mathcal{N}_i}$  be the group vector containing

Specifically, the SINR of a UE  $u \in \mathcal{U}$  connected to cell  $c \in \mathcal{C}$  is defined as:

$$\text{SINR}_{i,u}(a_i) = \frac{P_i G_{i,u}(a_i) L_{i,u}(a_i)}{\sum_{k \in \mathcal{N}_i} P_k G_{k,u}(a_k) L_{k,u}(a_k) + \sigma},$$

where  $P_i$ ,  $G_{i,u}$ , and  $L_{i,u}$  are the transmitter antenna power, the gain of the transmitter antenna, and path loss for UE  $u$  connected to cell  $i$ , respectively. The gain is influenced by antenna parameters such as tilt and azimuth, and the path loss accounts for the transmission medium and obstacles (e.g., buildings, atmospheric conditions, vegetation, etc.). The throughput  $T_{i,u}$  experienced by UE  $u$  connected to the cell  $i$  is then expressed as a function of the SINR and available bandwidth:

$$T_{i,u} = \omega_B n_{i,u}^R \log_2(1 + \text{SINR}_{i,u}),$$

where  $n_{i,u}^R$  is the number of Physical Resource Blocks (PRBs) allocated to UE  $u$  in cell  $i$  and  $\omega_B$  is the bandwidth per PRB (180 kHz). We use the average throughput of a cell in our group reward definition, i.e.,

$$r_i(a_e) = \frac{1}{|\mathcal{U}_i|} \sum_{u \in \mathcal{U}_i} T_{i,u}.$$

Hence the global reward is expressed as

$$r(a) = \sum_{i \in [N]} \frac{1}{|\mathcal{U}_i|} \sum_{u \in \mathcal{U}_i} T_{i,u}(a_e).$$

**On the noise independence assumption.** In our experiments, each group  $e \in [\rho]$  corresponds to a sector: more precisely, it consists of an antenna  $i \in [N]$  serving the users  $u \in \mathcal{U}_i$  connected to this sector, and the set of antennas that can interfere with the transmissions of the antenna  $i$ .

Recall that the group reward is defined as  $r_e(a_e) = \sum_{u \in \mathcal{U}_i} T_{i,u}(a_e)$ , where  $a_e$  represents the tilts of antennas in group  $i$ . The throughput  $T_{i,u}(a_e)$  is the rate at which an user  $u$  can decode transmissions from the antenna  $u$ . This rate depends on the random channel conditions (also known as *fading*) between each antenna in the group and the user  $i$ . Now the fading between pairs of (antenna, user) are typically stochastically independent across users and antennas [32].

Since the sets of  $(\mathcal{U}_i)_{i \in [N]}$  form a partition, they do not overlap, and the random variables  $r_e(a_e)$  are indeed independent across groups. They can be modeled as independent Gaussian realizations in the sum-throughput over groups. For details, refer e.g., to [32].

**Additional details.** The set of UEs in the network is  $\mathcal{U} = \cup_{i \in \mathcal{S}} \mathcal{U}_i$  as presented in Sec. 7.2. The number of UEs connected to cell  $i$  is affected by tilt variation since we assume UEs connect to the cell from which they get maximum Reference Signal Received Power (RSRP). In particular, given a tilt configuration  $a$ , the UEs in cell  $i$  are defined as

$$\mathcal{U}_i = \left\{ u \in \mathcal{U} : \arg \max_{k \in [N]} P_k G_{k,u} L_{k,u} = i \right\}.$$

There exist other methods to determine relations between antennas which rely on automated procedures, domain knowledge, and heuristics. For example, they may be based on the geographic distance between cells, on Neighbor Relations (ANR) as defined in 3GPP standards, on network planning tools for coverage prediction, or on cell handover logs [32]. In addition, domain knowledge can be used to refine the graph topology by pruning or adding edges based on key feature of a city or knowledge about the terrain (if there is a natural obstacle for example). Analyzing the influence of the graph structure is not in the scope of this paper and is left as future work.

## M Extended literature review

### M.1 MAMABs

As mentioned in Sec. 2, a few papers investigate MAMABs with the same factored reward structure as ours [2, 35, 37] for regret minimization.

Bargiacchi et al. [2] study a MAMABs setting in which the group rewards are random variables with finite support:  $r_e(a_e) \in [0, r_{e,\max}]$ , for all  $e \in [\rho]$ ,  $a_e \in \mathcal{A}_e$ . They propose MAUCE, an UCB-type algorithm, in which the bonus term is a non-linear sum of the group UCBs: at time  $t$ , MAUCE selects a global action

$$a_t = \arg \max_{a \in \mathcal{A}} \sum_{e \in [\rho]} \hat{\theta}_{t,e,a_e} + \sqrt{\frac{1}{2} \sum_{e \in [\rho]} \frac{r_{e,\max}}{N_{t,e,a_e}} \log(tA)}.$$

The non-linearity in the UCB term makes it difficult to use the VE to select the arm maximizing the UCB. They propose an efficient routine based on Multi-Objective Variable Elimination (MOVE) to compute the optimal UCB index. However, the computational complexity of the procedure is unclear. The asymptotic regret of MAUCE satisfies:

$$\liminf_{T \rightarrow \infty} \frac{R^{\pi_{\text{MAUCE}}}(T)}{\log(T)} \leq \frac{\Delta_{\min}^2 + 2\tilde{A}(\sum_{e \in [\rho]} r_{e,\max}^2)}{\Delta_{\min}^2}.$$

Assume that the means of the MAMABs parameters are bounded as  $\theta_e(a_e) \in [0, r_{\max}]$ ,  $\forall e \in [\rho]$ ,  $a_e \in \mathcal{A}_e$ , then our worst approximation ( $C_{\theta}^{\text{MF}}(1)$ ), is better than a factor  $r_{\max}$  with respect to the MAUCE bound. To see why, observe that by Lem. 5.4, we can upper bound  $C_{\theta}^{\text{MF}}(1)$  as:

$$C_{\theta}^{\text{MF}}(1) \leq \rho \Delta_{\min}^{-2} \sum_{e \in [\rho], a_e \in \mathcal{A}_e} (\theta(a_e^*) - \theta_e(a_e)) \leq 2\rho^2 \Delta_{\min}^{-2} \tilde{A} r_{\max},$$

while the leading constant of regret upper bound of MAUCE is  $2\rho^2 \Delta_{\min}^{-2} \tilde{A} r_{\max}^2$ .

Stranders et al. [35] study a similar setting with bounded rewards  $r_e(a_e) \in [u_{\min}, u_{\max}]$ , for all  $e \in [\rho]$ ,  $a_e \in \mathcal{A}_e$ . They propose HEIST, also an UCB-type algorithm. The asymptotic regret of HEIST satisfies

$$\liminf_{T \rightarrow \infty} \frac{R^{\pi_{\text{HEIST}}}(T)}{\log(T)} \leq \sum_{a \neq a^*} \frac{8(u_{\max} - u_{\min})}{\Delta(a)},$$

which is clearly sub-optimal as it scales with the number of global arms  $|\mathcal{A}|$ .

Finally, [37] study the MAMAB setting in the Bayesian setting with sub-Gaussian rewards and propose Multi-Agent Thompson Sampling (MATS), a TS-based algorithm whose regret satisfies

$$R^{\pi_{\text{MATS}}}(T) \leq 2/\tilde{A} + \sqrt{64\sigma^2 \rho \tilde{A} T \log(\tilde{A} T)}.$$

Because of the differences in the problem formulations, this bound is not directly comparable to ours.

Finally, there are a few related works in MAMABs investigating the Best Arm Identification (BAI) problem [36, 3], where the objective is to identify the best global action with a prescribed error probability. In a closely related work [36], the authors derive a sample complexity lower bound defined through an optimization problem that is similar in structure to the one we derive for regret minimization and has exponentially many variables and constraints. Similar to our work, they derive an MF approximation of the lower bound problem. However, these MF approximations result in a non-convex optimization problem for the regret minimization setting (see App. B).

### M.2 Combinatorial Semi-Bandit Feedback

There is a large body of work [7, 10, 16, 40, 12, 13, 31, 38] investigating regret minimization in the (linear) combinatorial semi-bandit feedback. Although MAMAB is a more particular instance of bandits with combinatorial semi-bandit feedback (see App. E), the MAMAB combinatorial structure has been never considered in this setting to the best of our knowledge.

Most of these works focused on achieving a good trade-off between computational complexity and regret rates. None of these works focus explicitly on the MAMAB structure considered in our paper.

There exists algorithm using combinatorial versions of UCB. For example, the Combinatorial UCB (CUCB) [6] enjoys a  $O(\tilde{A}\rho \log(T)/\Delta_{\min})$  regret guarantee. Combes et al. [10] propose the first (tight) lower bound in the combinatorial semi-bandit feedback setting and propose ESCB, an UCB-type algorithm which enjoys a  $O(\tilde{A}\sqrt{\rho} \log(T)/\Delta_{\min})$  regret bound. Subsequently, Degenne et al. [16] tightens this regret bound to  $O(\tilde{A} \log(\rho)^2 \log(T)/\Delta_{\min})$ . All of the above-mentioned algorithms are sub-optimal and postulate the existence of a maximization oracle of the type

$$\max_{a \in \mathcal{A}} \sum_{e \in [\rho]} \theta_e(a_e) + \sqrt{\sum_{e \in [\rho]} \frac{c \log(T)}{N_{a_e}(t)}},$$

for some  $c > 0$ . The oracle is invoked at each time step, and hence, if such an efficient oracle exists (e.g., can be computed in polynomial time), the resulting algorithm is efficient. For many structures (e.g.,  $m$ -sets, spanning trees, matroids, etc.) [13] showed that computing such maximum is an  $\mathcal{NP}$ -hard problem. As mentioned in App. M.1, for our MAMAB combinatorial structure, [2, 35] propose algorithms to compute such maximization, but without any computational complexity guarantee. Furthermore, Cuvelier et al. [13] proposes A-ESCB, which achieves a regret bound  $O(\tilde{A} \log(\rho)^2 \log(T)/\Delta_{\min})$  by solving multiple times a budgeted linear optimization of the type  $\max_{a \in \mathcal{A}: \sum_e c_e \mu_e(a_e) \geq s} \sum_{e \in [\rho]} \theta_e(a_e)$ . In such case, the existence of an efficient oracle solving the budgeted linear maximization problem is assumed, which is true only for particular structures (specifically  $s$ -paths and  $m$ -sets).

Combinatorial bandit algorithms based on TS techniques [40, 31] usually require, at each time step, a maximization step of the type

$$\max_{a \in \mathcal{A}} \sum_{e \in [\rho]} \theta_e(a_e).$$

We show in Lem. H.1 that, for general factor graphs, performing this operation is  $\mathcal{NP}$ -hard.

Finally, Cuvelier et al. [12] derive the first asymptotically optimal algorithm for the semi-bandit feedback problem in polynomial time. We should mention that for our local approximation  $C_{\theta}^{\circ}$ , [12, Assumption 6] is satisfied:  $\exists M \in \mathbb{R}^{c \times d}, b \in \mathbb{R}^c$ , with  $c = O(\text{poly}(\tilde{A}))$ :  $\text{co}(\mathcal{A}) = \{\tilde{w} \in \mathbb{R}^A : M\tilde{w} = b, \tilde{w} \geq 0\}$ , i.e., the convex hull of the (global) action set can be represented by a polynomial number of inequalities. However, this approximation only holds for acyclic factor graphs, while the case of cyclic factor graphs is, to the best of our knowledge, not considered.
